# Supplementary material for: A pre-registered short-term forecasting study of COVID-19 in Germany and Poland during the second wave
Source: PubMed Central journal article supplement (PMC8397791; doi:10.1038/s41467-021-25207-0), 2021-08-27
Supplement: 41467_2021_25207_MOESM1_ESM.pdf [file 41467_2021_25207_MOESM1_ESM.pdf]

642 Supplementary Materials for Bracher et al. (2021):  
643 A pre-registered short-term forecasting study of COVID-19 in Ger-  
644 many and Poland during the second wave

645 **Supplementary Note 1 Additional time series plots**

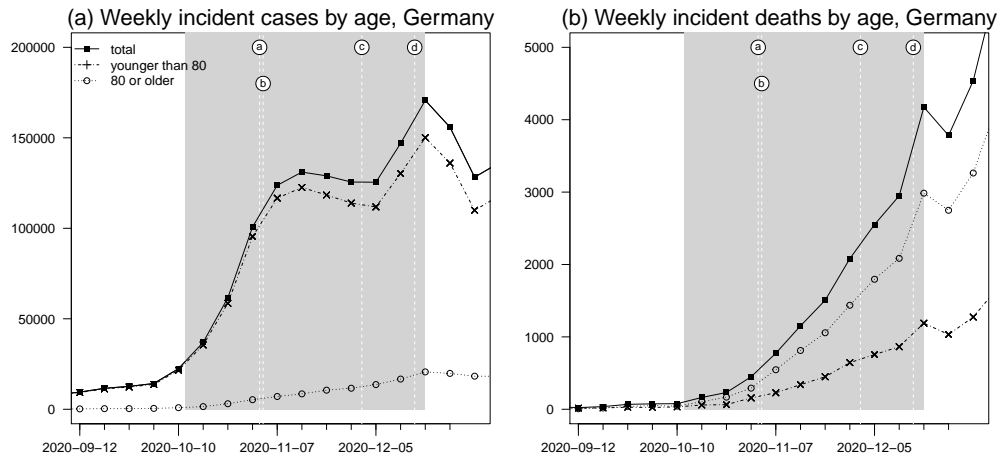

Supplementary Figure 1: **a** Weekly incident COVID-19 cases and **b** deaths in Germany, pooled and stratified by age below and above 80 years. The time period covered by our study is highlighted in grey. Events marked by letters a – d are explained in Figure 1.

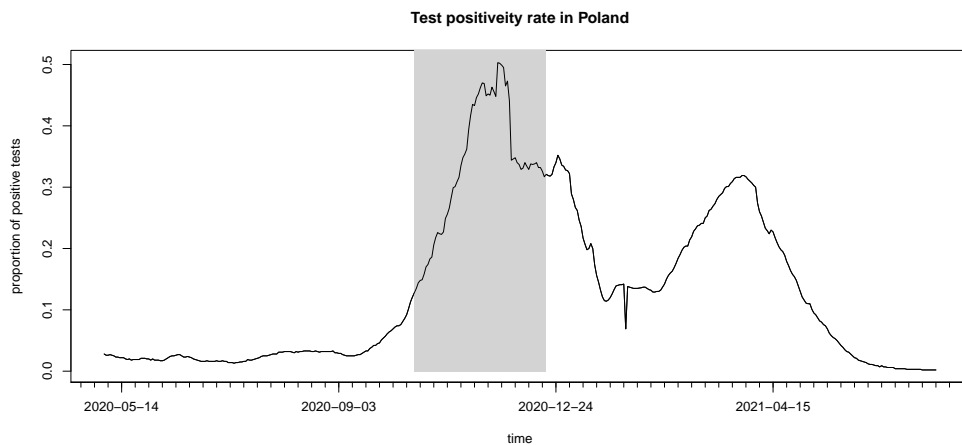

Supplementary Figure 2: Smoothed test positivity rates in Poland. The time period covered by our study is highlighted in grey.

646 Test positivity data were downloaded from <https://ourworldindata.org/coronavirus-testing> and originate  
647 from

648 Hasell, J., Mathieu, E., Beltekian, D. et al. A cross-country database of COVID-19 testing. *Sci Data* 7,  
649 345 (2020)

## Supplementary Note 2 Detailed description of baseline forecasts

We here describe the three baseline forecasts mentioned in the main manuscript in more detail.

**KIT-baseline** Denote the quantity of interest on the incidence scale by  $X_t$ . The corresponding quantity on the cumulative scale is denoted by  $Y_t = \sum_{s \leq t} X_s$ . The one-week-ahead forecast for  $X_{t+1}$  is given by a negative binomial distribution with mean  $X_t$  and overdispersion parameter  $\psi$ . Due to the skewness of the negative binomial distribution this implies that the predictive median is slightly smaller than  $X_t$ . The overdispersion parameter is estimated from the last five available observations using a maximum likelihood approach, i.e. by maximizing

$$\sum_{i=0}^4 \log \pi(X_{t-i} | X_{t-i-1}, \psi) \quad (3)$$

with respect to  $\psi$ , where  $\pi(\cdot | X_{t-i-1}, \psi)$  is the probability mass function of a negative binomial distribution with mean  $X_{t-i-1}$  and overdispersion parameter  $\psi$ . For technical reasons we replace any mean of a negative binomial distribution which would equal zero by 0.2. The two- to four-week-ahead forecasts are simply set to the same distribution as the one-week-ahead forecast.

To obtain forecasts on the cumulative scale we assume independence between  $X_{t+1}, X_{t+2}, X_{t+3}$  and  $X_{t+4}$ . As the sum of independent random variables following negative binomial distributions with the same overdispersion parameter follows again a negative binomial distribution,  $Y_{t+1}, Y_{t+2}, Y_{t+3}$  and  $Y_{t+4}$  follow shifted negative binomial distributions with overdispersion parameter  $\psi, 2\psi, 3\psi$  and  $4\psi$ , respectively.

**KIT-extrapolation\_baseline** We assume again a (conditional) negative binomial distribution, but with mean  $\lambda_{t+1} = \alpha X_t$  rather than just  $X_t$ . The parameter  $\alpha$  is estimated from the last three observed values in the following way:

- If the last three observations are ordered, i.e.  $X_{t-2} < X_{t-1} < X_t$  or  $X_{t-2} > X_{t-1} > X_t$  we let

$$\alpha = \frac{X_t}{X_{t-1}}, \quad (4)$$

which corresponds to simple multiplicative extrapolation.

- Otherwise we let  $\alpha = 1$ , so that the predictive mean  $\lambda_{t+1}$  equals the last observation  $X_t$ .

The idea behind this distinction is that the model should only use trends if they have manifested for at least two weeks. The overdispersion parameter is estimated by maximizing

$$\sum_{i=1}^5 \log \pi(X_{t-i} | \lambda_{t-i}, \psi), \quad (5)$$

with respect to  $\psi$  (keeping the value  $\alpha$  entering into  $\lambda_{t-i} = \alpha X_{t-i-1}$  constant at the value chosen as described above). Note that we do not use the last observation  $X_t$  here as by construction (if the last three observations are ordered)  $X_t = \lambda_t$ .

We then sample 100,000 paths  $(X_{t+1}, X_{t+2}, X_{t+3}, X_{t+4})$  from this model and obtain forecast quantiles for both incident and cumulative quantities from these samples.

**KIT-time\_series\_baseline** We fit an exponential smoothing model with multiplicative errors and without seasonality to the last 12 observations on the incidence scale. The R (26) command is

```
forecast::ets(ts, model="MMN")
```

using the `forecast` package (40) (version 8.12). As noted in the main text, this specification is taken from (41). As in the previous section we proceed by sampling paths from this model and computing predictive quantiles from them.

## Supplementary Note 3 Descriptions of submitted forecasts

We provide more extensive descriptions of the models listed in Table 3, including details on inference approaches and computation times.

**CovidAnalytics-DELPHI** Predictions for future cases are obtained from a heavily modified SEIR model. New states are added to account for cases that went undetected, while quarantined and hospitalized patients are separated. The infection rate is corrected with a nonlinear curve that represents the cumulative effect of governmental and societal response (which is assumed to change according to the magnitude of the outbreak). Key parameters for the disease are fixed using a meta-analysis conducted by the CovidAnalytics group of over 150 parameters while epidemiological parameters are fitted to historical death counts and detected cases. The epidemiological parameters are fitted using a moving time window with truncated Newton and simulated annealing to effectively capture the latest changes in the epidemic trends. Uncertainty intervals are generated using re-sampling of the out-of-sample error for the predictions two weeks ago by fitting the historical out-of-sample error to a normal distribution. Then we assume that the incremental estimates for each week have random errors of such magnitude that are independent (and additive) by week. Generating the forecasts for one country takes a few minutes on a standard laptop.

**epiforecasts-EpiExperts** The EpiExpert model represents predictions from experts and non-experts that were submitted through an R Shiny application ([app.crowdforecastr.org](http://app.crowdforecastr.org)). Participants could select a distribution family and specify the median and spread of the predictive distribution by dragging points or adjusting numeric input values. Available distributions were several transformations of a normal distribution (normal, log-normal, 3rd-, 5th, and 7th-power normal). From every predictive distribution, 23 quantiles were obtained. Lastly, an ensemble was formed by aggregating predictions using a quantile-wise mean. Participation increased over time from around 3 to around 5–10 weekly forecasters. To inform their forecasts, participants could use any data they liked. The data shown in the app was data from the ECDC, RKI and the Polish Ministry of Health. Participants were shown additional information from [ourworldindata.org](http://ourworldindata.org).

**epiforecasts-EpiNow2** EpiNow2 is an exponential growth model that uses a time-varying  $R_t$  trajectory to forecast latent infections, and then convolves these infections using known delays to observations, via a negative binomial model coupled with a day of the week effect. It makes limited assumptions and is not tuned to the specifics of COVID-19 in Germany and Poland beyond epidemiological details such as literature estimates of the generation time, incubation period and the population of each country. The reproductive number  $R_t$  is assumed to remain static after the respective last observed values.

Each forecast target was fit independently for each model using Markov-chain Monte Carlo (MCMC) using the Stan software and RStan interface (<https://mc-stan.org/rstan/>). A minimum of 4 chains were used with a warmup of 250 samples and 2000 samples total post warmup. Forecast intervals were calculated from the generated MCMC samples, aggregating daily posterior samples to the required weekly scale. Forecast generation for all targets, both national and subnational, took not more than 2 hours using 16 CPU cores.

**FIAS FZJ-Epi1Ger** This is an extended version of the well-established SEIR (susceptible – exposed – infectious – removed) model, i.e. a deterministic approach based on a system of ordinary differential equations. Mixing in the population is assumed to be homogeneous, but infectiousness varies across three possible compartments, namely, asymptomatic undetected, symptomatic undetected and detected cases. Detection can occur both in an early stage, that is, during latent phase (E, assumed not yet infectious) or when the patient is already infectious (asymptomatic/symptomatic). Undetected infections lead to undetected recoveries, whereas detected cases may either recover or die. We do not explicitly incorporate a reporting delay in recording fatalities. Daily new detected cases and reported deaths are used for model calibration. Transmission, detection and death rates are assumed to be piecewise constant in time and fitted using reported data (time series data from RKI/ECDC). The fitting algorithm is based on Monte Carlo sampling and minimization of sum of squared residuals, evaluating results with the Akaike information criterion. Parameter values obtained from the fit of the most recent interval are used for model predictions (incident/cumulative cases and deaths). The model is not age-stratified and does not take into account advance knowledge on

733 mitigation measures to be applied, e.g. to reduce contact rates in the population. To quantify the uncer-  
734 tainty of forecasts, the model fits obtained via Monte Carlo sampling of the parameter space are collected  
735 in histograms according to their Akaike weights. Predictive quantiles are calculated from these weighted  
736 histograms. The calculations take about 10 to 15 minutes on a single core of a workstation, but can be  
737 accelerated considerably by partly re-using results of recent model runs.

738 **ICM-agentModel** The model aims to represent the social structure of the Polish population at the level  
739 of the individual citizens and their social contacts. It is spatially structured and contains representations  
740 of different contexts. The model follows the development of the epidemic on a geographical grid with a  
741 resolution of 1km and through physical contact in various contexts of social life. It currently contains  
742 representations of households, workplaces, kindergardens, schools, universities, travel, streets and public  
743 places. The approach can serve for short-term prediction of the development of the epidemic and for the  
744 exploration of various scenarios. These can shed light on the effects of newly introduced policies and non-  
745 pharmaceutical interventions. The model features a detailed demographic stratification where each agent has  
746 an attribute of age and gender. The likelihood of severe symptoms, hospitalization, ICU treatment and death  
747 depends on age. Agents of different age appear in different contexts (schools, workplaces, travel, etc.) with  
748 different probabilities. The model is fitted via a Bayesian inference approach. Data inputs include publicly  
749 available epidemiological data (number of cases, deaths etc) from the Polish Ministry of Health as well as  
750 more detailed data available via the Polish National Institute for Public Health (time of hospitalization,  
751 age, symptoms, contact tracing etc). Computations are performed on a Cray-XC40 supercomputer. The  
752 generation of forecast for Poland takes 1 hour of computing time on 10 nodes (node: Intel Xeon E5-2690 v3  
753 2.6 GHz 2 x 12 cores, hyperthreading x2, 128 GB RAM).

754 **imperial-ensemble2** To generate forecasts at a horizon of seven days, an unweighted ensemble of three  
755 models is used:

- 756
- Model 1 assumes a conditional Poisson distribution and the renewal equation

$$I_t \sim \text{Pois} \left( R_t \sum_{s=0}^t I_{t-s} w_s \right), \quad (6)$$

757 where  $I_t$  are deaths reported on day  $t$ . Here, the serial interval distribution  $w$  is a gamma distributon  
758 with mean 6.48 days and a standard deviation of 3.83 days. The instantaneous reproduction number  
759  $R_t$  is estimated via a maximum likelihood approach from the last 10 days (jointly with the incidence  
760 prior to the 10 day window). Forecasts are obtained by simulating stochastic realisations of the renewal  
761 equation from the end of the calibration period.

- Model 2 optimises the choice of time window over which the reproduction number is assumed to be  
762 constant for estimating. The optimal window is one which minimises the accumulated predictive error  
763 (APE) in 1-step ahead predictions over the entire time series. Estimates of reproduction numbers using  
764 the optimal time window are then used to project forward using the renewal equation.  
765
- Model 3 uses both the reported number of cases and deaths. The reported cases are weighted with a  
766 reporting to death delay distribution to obtain the largest potential number of deaths, if all reported  
767 cases were to die. The observed number of deaths is used to estimate an observed fatality ratio.  
768 Forward projections are then obtained by sampling from a binomial distribution with the weighted  
769 case count and estimated fatality ratio.  
770

771 For each model, we generate 10000 samples from the posterior distribution of reproduction number and  
772 obtain 10000 simulations of forward projections. Uncertainty intervals are provided by the quantiles of the  
773 posterior distribution. Computations require approximately 10 minutes on an 8 GB Macbook Pro.

774 **ITWW-county\_repro** Reproduction numbers on the county level are estimated via a small area approach  
775 where reproduction numbers are modeled as random variables. First we sample for every county reproduction  
776 numbers for the past week and compute their mean. This value is held constant over one simulation and

777 we sample from the reproduction equation to generate daily future cases on the county level. These are  
778 aggregated to the state and country level. Finally, for Germany, we account for the delay with which these  
779 cases appear in the ECDC dataset as our reproduction numbers are based on the official RKI dataset. To  
780 forecast deaths we sample on the state level the age of every case and use case-fatality ratios for every  
781 age group to forecast which cases will later be marked as death; the delay until death is sampled from a  
782 reporting-to-death distribution. We then aggregate the deaths from the state level to the country level. The  
783 model contains a detailed age stratification. For Germany we use age-stratified attack-rates and case-fatality  
784 ratios which we estimate from the official RKI data. The age groups we consider are: 0–4, 5–14, 15–34,  
785 35–59, 60–79, 80+ and unknown. For Poland we consider age groups from 0 to 100 by year (101 age groups).  
786 Generation of forecasts takes less than 10 minutes on a standard laptop.

787 **LANL-GrowthRate** The model makes predictions about the future, unconditional on particular intervention  
788 strategies. It consists of two processes. The first process is a statistical model of how the number of COVID-  
789 19 infections changes over time. The second process maps the number of infections to the reported data. We  
790 model the growth of new cases as the product of a dynamic growth parameter and the underlying numbers  
791 of susceptible and infected cases in the population at the previous time step, scaled by the size of the state’s  
792 starting susceptible population. The growth parameter can be thought of as the transmissibility of the virus  
793 in that state on that date and is a weighted regression between the trend in the growth rate over the past 42  
794 days and a growth rate that would keep the number of new daily confirmed cases constant. The weights of  
795 these two components are dynamically tuned to the observed data. To model new deaths in the population,  
796 we assume that a fraction of the 1, 2, 3, 4, or 5-week moving average of the daily confirmed cases will die.  
797 The model learns both the moving average window and the case fatality fraction that best fits the historical  
798 observations.

799 **LeipzigIMISE-SECIR** An adapted mechanistic epidemiological model of the SECIR (susceptible – exposed  
800 – carriers – infected – recovered) type is integrated into Input-Output Non-Linear Dynamical Systems (IO-  
801 NLDS) serving as hidden layers, i.e. the true dynamics cannot be observed directly. The model contains an  
802 asymptomatic compartment, a compartment of patients requiring intensive care, and most of the compart-  
803 ments are divided into three sub-compartments to represent time delays. Changing factors of the system  
804 due to non-pharmaceutical interventions, changing age-structure of the infected population, and changes in  
805 testing policies are imposed as inputs to the system. Parameters are then estimated by a knowledge synthesis  
806 process considering parameter ranges derived from external studies and public data. Specifically, a Bayesian  
807 inference approach is taken to estimate time-varying parameters. Public data is translated to model outputs  
808 not identical but related to hidden states of the model. The model is fitted to data by a full information  
809 approach. The Stochastic Approximation Expectation Maximization (SAEM) algorithm is used to estimate  
810 model parameters by minimizing the negative log-likelihood of the observations. The number of updates of  
811 time-dependent variables is determined via the Bayesian information criterion (BIC). After determination of  
812 residual errors of parameters via SAEM, MCMC chains are simulated in order to sample possible alternative  
813 parameter sets around the optimal solution from the distribution, determined by the constrained negative  
814 log-likelihood function. Generation of forecasts requires several hours on a standard desktop computer.

815 **MIMUW-StochSEIR** The model uses an extension of the SEIR (susceptible – exposed – infected – recovered)  
816 approach. The key developments to account for the specifics of COVID-19 are: (i) inclusion of the daily  
817 number of tests into the model; (ii) addition of a state representing undiagnosed infected and undiagnosed  
818 recovered patients; (iii) a Bayesian inference approach. The main parameters of this extended model are  
819 assigned prior distributions with hyperparameters based on the literature or preliminary analyses using  
820 deterministic SEIR models. The posterior distributions are computed using the Monte Carlo Metropolis-  
821 Hastings algorithm. The final parameter estimates are then given by the posterior means, and the uncertainty  
822 intervals by respective quantiles. The typical computation (3000 steps with 1000 steps of the burn-in phase)  
823 takes roughly 4 hours on a 2.3 GHz Dual-core Intel Core i5.

824 **MOCOS-agent1** This is an agent based model based on heterogeneous random network structures for po-  
825 tentially infectious contacts. The network structure is defined by sets of context and feature-dependent

826 non-symmetric kernels. The dynamics is time-continuous, event driven microsimulation. It takes into ac-  
 827 count census data on household composition, age distribution, work places etc. The model includes contact  
 828 tracing, both classic and app-based, testing and quarantine. All relevant duration times like incubation  
 829 time, time to hospitalization and time to testing are sampled from distributions based on empirical data.  
 830 Spatial structures are implemented but not used at the moment for country wide forecasts. We take into  
 831 account changes in delay distribution over time, e.g in time from symptom onset to reporting. Even more  
 832 importantly, changes in testing strategies and their impact on the dark figure of cases are taken into account

833 Inference is done using a mixture of Bayesian inference, maximum likelihood methods and Monte Carlo  
 834 search. Uncertainty intervals are generated via a likelihood distribution over an ensemble of suitable sample  
 835 paths involving different parameters. For each relevant parameter configuration, 100 sample paths are  
 836 generated and weighted.

837 Computations are done in parallel on the Lower Silesia (Poland) high performance super cluster and  
 838 depending on size of parameter space to be searched can take more than 24 hours

839 **UCLA-SuEIR** The SuEIR model is a variation of the SEIR (susceptible – exposed – infected – recovered)  
 840 model that features the following compartments (with the total size of the population denoted by  $N$ ):

- 841 •  $S_t$ : The number of susceptible individuals at time  $t$ , i.e. individuals who can still acquire the disease.
- 842 •  $E_t$ : The number of individuals who have already been infected but have not been tested/diagnosed  
 843 with the disease. Unlike in the classic SEIR model this group can also cause new infections.
- 844 •  $I_t$ : The number of individuals who are infected and have received a positive test.
- 845 •  $R_t$ : The number of individuals who have been infected and received a positive test and have since  
 846 either recovered or died.
- 847 •  $u_t$ : The unobserved number of individuals who have been infected, but not received a positive test,  
 848 and have since recovered or died.

These compartments are linked via the following system of differential equations:

$$\frac{dS_t}{dt} = -\frac{\beta(I_t + E_t)S_t}{N}, \quad \frac{dE_t}{dt} = \frac{\beta(I_t + E_t)S_t}{N} - \sigma E_t, \quad \frac{dI_t}{dt} = \mu\sigma E_t - \gamma I_t, \quad (7)$$

$$\frac{dR_t}{dt} = \gamma I_t, \quad \frac{du_t}{dt} = (1 - \mu)\sigma E_t, \quad (8)$$

849 where  $\beta$  is the contact rate between the susceptible and infectious (i.e.  $I_t$  and  $E_t$ ) groups,  $\gamma$  is the rate at  
 850 which individuals leave the detected case compartment (due to recovery or death),  $\mu$  is the discovery rate and  
 851  $\sigma$  is the ratio of cases in the exposed compartments that are either confirmed as infectious or dead/recovered  
 852 without confirmation. To generate predictions of fatalities, a time-varying ratio  $r_t$  of deaths and removals  
 853 due to recovery is estimated. The model is fit to reported cases and fatalities via a logarithmic-type mean  
 854 squared error approach and gradient based optimization.

855 **USC-SIkJalpha** Forecasts are generated using an epidemic model called **SIkJalpha**, a preliminary version  
 856 of which has been successfully used during the DARPA Grand Challenge 2014. The model can consider the  
 857 effect of many complexities of the epidemic process and yet be simplified to a few parameters that are learned  
 858 using fast linear regressions. Therefore, the approach can learn and generate forecasts extremely quickly.  
 859 The model is able to quickly adapt to changing trends, and the variations in parameters during different  
 860 times/policies enable the generation of different scenarios such as what would happen if we were to disregard  
 861 social distancing suggestions. For each state, hospitalizations are modelled as a separate compartment, as  
 862 a linear function of recent cases with heterogeneous rates. This means that for a hyper-parameter  $J$ , those  
 863 who were infected at time  $t - 1$  to  $t - J$  will have a separate rate from those infected at  $t - (J + 1)$  to  
 864  $t - 2J$ , and so on. Death forecasts are generated in a similar fashion. For long-term forecasts (more than a  
 865 few days in the future), cases are predicted first based on the **SIkJalpha** model, which forms the input to  
 866 hospitalization prediction. While changing trends are accounted for by putting more emphasis on recently

867 seen data, it is assumed that the trends will remain the same in the future for point forecasts. The approach  
868 attempts to account for changing trends in the future in the quantile forecasts by modeling the empirical  
869 errors using a random forest.

870 **SDSC-ISG.TrendModel** Forecasts are based on the reported numbers of cases and deaths at the country or  
871 regional level. No information about measures or changes in policies is used for forecasting. The modelling  
872 substantially relies on trend estimation of the time series of the number of daily cases/deaths. To account  
873 for non-stationary weekly seasonality, outliers, missing data and delayed reports, and reliably estimate the  
874 underlying trend for each of the time series, we use a robust seasonal trend decomposition model based on  
875 LOESS (LOcally Estimated Scatterplot Smoothing). In order to better adapt to the changes in the data,  
876 trends are estimated locally in overlapping time series subintervals, while the global smooth trend estimate  
877 is a pointwise weighted combination of the overlapping local models. To predict daily cases and deaths we  
878 use linear extrapolation of the estimated smooth trend either on the original or on the logarithmic scale.

## 879 **Supplementary Note 4**   **Details on truth data sources**

880 The different truth data are publicly available in the following locations:

- 881     • Daily data compiled by ECDC until 14 December are available at [https://www.ecdc.europa.eu/en/](https://www.ecdc.europa.eu/en/publications-data/download-todays-data-geographic-distribution-covid-19-cases-worldwide)  
882       publications-data/download-todays-data-geographic-distribution-covid-19-cases-worldwide
- 883     • Daily data compiled by the Center for Systems Science and Engineering at Johns Hopkins University  
884       (25, JHU) are available at [https://github.com/CSSEGISandData/COVID-19/tree/master/csse\\_covid\\_](https://github.com/CSSEGISandData/COVID-19/tree/master/csse_covid_19_data)  
885       19\_data
- 886     • Daily data from Robert Koch Institute were extracted from [https://npgeo-corona-npgeo-de.hub.arcgis.](https://npgeo-corona-npgeo-de.hub.arcgis.com/datasets/dd4580c810204019a7b8eb3e0b329dd6_0)  
887       com/datasets/dd4580c810204019a7b8eb3e0b329dd6\_0. Note that the data provided there are on a  
888       different time scale than used in this article (a mix of symptom onset and date of reporting to local  
889       authorities). Data by reporting date to the national authorities were generated by comparing data sets  
890       made available on subsequent days. The generated data set (available in the Forecast Hub platform)  
891       is in agreement with the ECDC data up to 14 December.
- 892     • Daily data from the Polish Ministry of Health were extracted from a widely used public spread sheet  
893       maintained by Michal Rogalski:  
894       [https://docs.google.com/spreadsheets/u/2/d/1ierEhD6gcq51HAm433knjnVwey4ZE5DCnu1bW7PRG3E.](https://docs.google.com/spreadsheets/u/2/d/1ierEhD6gcq51HAm433knjnVwey4ZE5DCnu1bW7PRG3E)  
895       These data are in agreement with the ECDC data up to 14 December.

896 All truth data time series, including historical versions, are also available in the folder [https://github.](https://github.com/KITmetricslab/covid19-forecast-hub-de/tree/master/data-truth)  
897 [com/KITmetricslab/covid19-forecast-hub-de/tree/master/data-truth](https://github.com/KITmetricslab/covid19-forecast-hub-de/tree/master/data-truth) of our repository.



## Supplementary Note 5 Sources on changes in non-pharmaceutical interventions and testing regimes

We here provide sources for the dates of interventions shown in Figure 1.

**Poland:** Government interventions are largely documented on the respective governmental web site and the Twitter channel of the Polish Ministry of Health (in Polish):

- <https://www.gov.pl/web/koronawirus/100-dni-solidarnosci-w-walce-z-covid-19>
- [https://twitter.com/MZ\\_GOV\\_PL](https://twitter.com/MZ_GOV_PL).

Specific news items on mentioned interventions/events:

- Four symptoms required for test: Ministerstwo Zdrowia przekazało zasady zlecenia testów na koronawirusa, Wprost, 23 September 2020, <https://www.wprost.pl/koronawirus-w-polsce/10368723/ministerstwo-zdrowia-przekazalo-zasady-zlecenia-testow-na-koronawirusa.html> (last accessed 22 December 2020).
- Only one out of four symptoms required for test: Dlaczego lekarz odmawia skierowania na test na COVID-19? Medonet, 5 November 2020, <https://www.medonet.pl/koronawirus/koronawirus-w-polsce,kiedy-lekarz-moze-odmowic-skierowania-na-test-na-koronawirusa,artykul,26303647.html> (last accessed 22 December 2020)
- Bulk reporting of 22,000 cases on 24 November: Rozbieżności w statystykach koronawirusa. 22 tys. przypadków będą doliczone do ogólnej liczby wyników, Forsal, 23 November 2020, <https://forsal.pl/lifestyle/zdrowie/artykuly/8017628,rozbieznosci-w-statystykach-koronawirusa-22-tys-przypadkow-beda-doliczone-do-ogolnej-liczby-wynikow.html> (last accessed 22 December 2020)
- High test positivity and suspected under-ascertainment: Polish doctors fear high rate of positive COVID tests show pandemic worse than it appears, J. Plucinska, Reuters, 1 December 2020, <https://www.reuters.com/article/us-health-coronavirus-poland-cases/polish-doctors-fear-high-rate-of-positive-covid-tests-show-pandemic-worse-than-it-appears-idUSKBN28B54Q> (last accessed 22 December 2020)

**Germany:** A chronicle of the most important events (in German) can be found on the web site of the German Ministry of Health and in a report issued by Robert Koch Institute:

- <https://www.bundesgesundheitsministerium.de/coronavirus/chronik-coronavirus.html>
- Schilling, J., Buda, S., Fischer, M., Goerlitz, L., Grote, U., Haas, W., Hamouda, O., Prahm, K., and Tolksdorf, K. (2021). Retrospektive Phaseneinteilung der COVID-19-Pandemie in Deutschland bis Februar 2021. *Epidemiologisches Bulletin*, 2021/15:3–12. Available at <http://dx.doi.org/10.25646/8149>.

Specific news items on mentioned interventions/events:

- Semi-lockdown from 2 November onwards: Coronavirus: Germany to impose one-month partial lockdown, Deutsche Welle, 28 October 2020, <https://www.dw.com/en/coronavirus-germany-to-impose-one-month-partial-lockdown/a-55421241> (last accessed 22 December 2020)
- New testing strategy announced: SARS-CoV-2-Diagnostik: RKI passt Testempfehlungen an, Ärzteblatt, 3 November 2020, <https://www.aerzteblatt.de/nachrichten/118001/SARS-CoV-2-Diagnostik-RKI-passt-Testempfehlungen-an> (last accessed 22 December 2020)
- Reinforced rules from 1 December onwards: Was gilt wo im Corona-Dezember? Tagesschau, 1 December 2020, <https://www.tagesschau.de/inland/corona-plan-bundeslaender-beschluss-103.html> (last accessed 22 December 2020)
- Full lockdown starting on 16 December: Lockdown in Deutschland – Das sind die Corona-Regeln. Tagesschau, 13 December 2020, <https://www.tagesschau.de/inland/corona-regeln-lockdown-101.html> (last accessed 22 December 2020)

# Supplementary Note 6 Availability and delays of forecasts

Supplementary Table 1: Availability of forecasts by model, target and forecast horizon.

Each entry describes up to which forecast horizon (in weeks) forecasts for incident cases, cumulative cases, incident deaths and cumulative deaths were made available (numbers in this order and separated by semicolons). Asterisks indicate that forecasts were only available on Wednesday or later rather than before Tuesday 3pm.

|                            | 2020-10-12  | 2020-10-19  | 2020-10-26  | 2020-11-02  | 2020-11-09  | 2020-11-16  | 2020-11-23  | 2020-11-30  | 2020-12-07  | 2020-12-14  |
|----------------------------|-------------|-------------|-------------|-------------|-------------|-------------|-------------|-------------|-------------|-------------|
| Germany                    |             |             |             |             |             |             |             |             |             |             |
| epiforecasts-EpiExpert     | 4; 4; 4; 4  | 4; 4; 4; 4  | 4; 4; 4; 4  | 4; 4; 4; 4  | 4; 4; 4; 4  | 4; 4; 4; 4  | 4; 4; 4; 4  | 4; 4; 4; 4  | 4; 4; 4; 4  | 4; 4; 4; 4  |
| epiforecasts-EpiNow2       | 4; 4; 4; 4* | 4; 4; 4; 4  | 4; 4; 4; 4  | 4; 4; 4; 4  | 4; 4; 4; 4  | 4; 4; 4; 4  | 4; 4; 4; 4  | 4; 4; 4; 4  | 4; 4; 4; 4  | 4; 4; 4; 4  |
| Imperial-FZJ-Epi1Ger       | 4; 4; 4; 4  | 4; 4; 4; 4  | 4; 4; 4; 4  | 4; 4; 4; 4  | 4; 4; 4; 4  | 4; 4; 4; 4  | 4; 4; 4; 4  | 4; 4; 4; 4  | 4; 4; 4; 4  | 4; 4; 4; 4  |
| Imperial-ensemble2         | -; -; 1; 1* | -; -; 1; 1* | -; -; 1; 1* | -; -; 1; 1* | -; -; 1; 1* | -; -; 1; 1* | -; -; 1; 1* | -; -; 1; 1* | -; -; 1; 1* | -; -; 1; 1* |
| ITWW-county_repro          | 4; 4; 4; 4  | 4; 4; 4; 4  | 4; 4; 4; 4  | 4; 4; 4; 4  | 4; 4; 4; 4  | 4; 4; 4; 4  | 4; 4; 4; 4  | 4; 4; 4; 4* | 4; 4; 4; 4  | 4; 4; 4; 4  |
| KIT-baseline               | 4; 4; 4; 4* | 4; 4; 4; 4  | 4; 4; 4; 4  | 4; 4; 4; 4* | 4; 4; 4; 4  | 4; 4; 4; 4* | 4; 4; 4; 4* | 4; 4; 4; 4* | 4; 4; 4; 4* | 4; 4; 4; 4  |
| KIT-extrapolation_baseline | 4; 4; 4; 4* | 4; 4; 4; 4  | 4; 4; 4; 4  | 4; 4; 4; 4  | 4; 4; 4; 4  | 4; 4; 4; 4  | 4; 4; 4; 4  | 4; 4; 4; 4  | 4; 4; 4; 4  | 4; 4; 4; 4  |
| KIT-time_series_baseline   | 4; 4; 4; 4* | 4; 4; 4; 4* | 4; 4; 4; 4* | 4; 4; 4; 4* | 4; 4; 4; 4* | 4; 4; 4; 4* | 4; 4; 4; 4* | 4; 4; 4; 4* | 4; 4; 4; 4* | 4; 4; 4; 4  |
| inverse_wis_ensemble       | 4; 4; 4; 4* | 4; 4; 4; 4* | 4; 4; 4; 4* | 4; 4; 4; 4* | 4; 4; 4; 4* | 4; 4; 4; 4* | 4; 4; 4; 4* | 4; 4; 4; 4* | 4; 4; 4; 4* | 4; 4; 4; 4  |
| median_ensemble            | 4; 4; 4; 4* | 4; 4; 4; 4* | 4; 4; 4; 4* | 4; 4; 4; 4* | 4; 4; 4; 4* | 4; 4; 4; 4* | 4; 4; 4; 4* | 4; 4; 4; 4* | 4; 4; 4; 4* | 4; 4; 4; 4  |
| LANL-GrowthRate            | -; 4; -; 4  | -; 4; -; 4  | -; 4; -; 4  | -; 4; -; 4  | -; 4; -; 4  | -; 4; -; 4  | -; 4; -; 4  | -; 4; -; 4  | -; 4; -; 4  | -; 4; -; 4  |
| LeipzigIMISE-SECIR         | 4; 4; 4; 4  | 4; 4; 4; 4  | 4; 4; 4; 4  | 4; 4; 4; 4* | 4; 4; 4; 4  | 4; 4; 4; 4* | 4; 4; 4; 4  | 4; 4; 4; 4  | 4; 4; 4; 4  | 4; 4; 4; 4* |
| MIT-CovidAnalytics-DELPHI  | 4; -; 4; 4  | 4; -; 4; 4  | 4; -; 4; 4  | 4; -; 4; 4  | 4; -; 4; 4  | 4; -; 4; 4  | 4; -; 4; 4  | -; -; 4; 4  | -; -; 4; 4  | 4; -; 4; 4  |
| SDSC-IGS-TrendModel        | 1; 1; 1; 1  | 1; 1; 1; 1  | 1; 1; 1; 1  | 1; 1; 1; 1  | 1; 1; 1; 1  | 1; 1; 1; 1  | 1; 1; 1; 1  | 1; 1; 1; 1  | 1; 1; 1; 1  | 1; 1; 1; 1* |
| UCLA-SuEIR                 | 4; 4; 4; 4* | 4; 4; 4; 4* | 4; 4; 4; 4  | 4; 4; 4; 4  | 4; 4; 4; 4  | 4; 4; 4; 4  | 4; 4; 4; 4  | 4; 4; 4; 4  | 4; 4; 4; 4  | 4; 4; 4; 4* |
| USC-SIkJalpha              | 4; 4; 4; 4  | 4; 4; 4; 4  | 4; 4; 4; 4  | 4; 4; 4; 4  | 4; 4; 4; 4  | 4; 4; 4; 4  | 4; 4; 4; 4  | 4; 4; 4; 4  | 4; 4; 4; 4  | 4; 4; 4; 4  |
| Poland                     |             |             |             |             |             |             |             |             |             |             |
| epiforecasts-EpiExpert     | 4; 4; 4; 4  | 4; 4; 4; 4  | 4; 4; 4; 4  | 4; 4; 4; 4  | 4; 4; 4; 4  | 4; 4; 4; 4  | 4; 4; 4; 4  | 4; 4; 4; 4  | 4; 4; 4; 4  | 4; 4; 4; 4  |
| epiforecasts-EpiNow2       | 4; 4; 4; 4* | 4; 4; 4; 4  | 4; 4; 4; 4  | 4; 4; 4; 4  | 4; 4; 4; 4  | 4; 4; 4; 4  | 4; 4; 4; 4  | 4; 4; 4; 4  | 4; 4; 4; 4  | 4; 4; 4; 4  |
| ICM-agentModel             | -; -; 4; 4  | -; -; 4; 4* | -; -; 4; 4* | -; -; 4; 4  | -; -; 4; 4  | -; -; 4; 4  | -; -; 4; 4  | -; -; 4; 4  | -; -; 4; 4* | -; -; 4; 4  |
| Imperial-ensemble2         | -; -; 1; 1* | -; -; 1; 1* | -; -; 1; 1* | -; -; 1; 1* | -; -; 1; 1* | -; -; 1; 1* | -; -; 1; 1* | -; -; 1; 1* | -; -; 1; 1* | -; -; 1; 1  |
| ITWW-county_repro          | 4; 4; 4; 4  | 4; 4; 4; 4  | 4; 4; 4; 4  | 4; 4; 4; 4  | 4; 4; 4; 4  | 4; 4; 4; 4  | 4; 4; 4; 4  | 4; 4; 4; 4* | 4; 4; 4; 4  | 4; 4; 4; 4  |
| KIT-baseline               | 4; 4; 4; 4* | 4; 4; 4; 4  | 4; 4; 4; 4* | 4; 4; 4; 4* | 4; 4; 4; 4  | 4; 4; 4; 4* | 4; 4; 4; 4* | 4; 4; 4; 4* | 4; 4; 4; 4* | 4; 4; 4; 4  |
| KIT-extrapolation_baseline | 4; 4; 4; 4* | 4; 4; 4; 4  | 4; 4; 4; 4  | 4; 4; 4; 4  | 4; 4; 4; 4  | 4; 4; 4; 4  | 4; 4; 4; 4  | 4; 4; 4; 4  | 4; 4; 4; 4  | 4; 4; 4; 4  |
| KIT-time_series_baseline   | 4; 4; 4; 4* | 4; 4; 4; 4* | 4; 4; 4; 4* | 4; 4; 4; 4* | 4; 4; 4; 4* | 4; 4; 4; 4* | 4; 4; 4; 4* | 4; 4; 4; 4* | 4; 4; 4; 4* | 4; 4; 4; 4  |
| inverse_wis_ensemble       | 4; 4; 4; 4* | 4; 4; 4; 4* | 4; 4; 4; 4* | 4; 4; 4; 4* | 4; 4; 4; 4* | 4; 4; 4; 4* | 4; 4; 4; 4* | 4; 4; 4; 4* | 4; 4; 4; 4* | 4; 4; 4; 4  |
| median_ensemble            | 4; 4; 4; 4* | 4; 4; 4; 4* | 4; 4; 4; 4* | 4; 4; 4; 4* | 4; 4; 4; 4* | 4; 4; 4; 4* | 4; 4; 4; 4* | 4; 4; 4; 4* | 4; 4; 4; 4* | 4; 4; 4; 4  |
| LANL-GrowthRate            | -; 4; -; 4  | -; 4; -; 4  | -; 4; -; 4  | -; 4; -; 4  | -; 4; -; 4  | -; 4; -; 4  | -; 4; -; 4  | -; 4; -; 4  | -; 4; -; 4  | -; 4; -; 4  |
| MIMUW-StochSEIR            | -; 4; -; 4  | -; 4; -; 4  | -; 4; -; 4  | -; 4; -; 4  | -; 4; -; 4  | -; 4; -; 4  | -; 4; -; 4  | -; 4; -; 4  | -; 4; -; 4  | -; 4; -; 4  |
| MIT-CovidAnalytics-DELPHI  | 4; -; 4; 4  | 4; -; 4; 4  | 4; -; 4; 4  | 4; -; 4; 4  | 4; -; 4; 4  | 4; -; 4; 4  | 4; -; 4; 4  | 4; -; 4; 4  | 4; -; 4; 4  | 4; -; 4; 4  |
| MOCOS-agent1               | 4; 4; 4; 4  | 4; 4; 4; 4* | 4; 4; 4; 4  | 4; 4; 4; 4  | 4; 4; 4; 4* | 4; 4; 4; 4  | 4; 4; 4; 4  | 4; 4; 4; 4  | 4; 4; 4; 4  | 4; 4; 4; 4  |
| SDSC-IGS-TrendModel        | 1; 1; 1; 1  | 1; 1; 1; 1  | 1; 1; 1; 1  | 1; 1; 1; 1  | 1; 1; 1; 1  | 1; 1; 1; 1  | 1; 1; 1; 1  | 1; 1; 1; 1  | 1; 1; 1; 1  | 1; 1; 1; 1* |
| USC-SIkJalpha              | 4; 4; 4; 4  | 4; 4; 4; 4  | 4; 4; 4; 4  | 4; 4; 4; 4  | 4; 4; 4; 4  | 4; 4; 4; 4  | 4; 4; 4; 4  | 4; 4; 4; 4  | 4; 4; 4; 4  | 4; 4; 4; 4  |

Most forecasts from Imperial-ensemble2 were only made available retrospectively to the Forecast Hub, but had previously been shown in real time on the web dashboard of the Imperial team.

# Supplementary Note 7 Additional results for one- and two-week-ahead forecasts

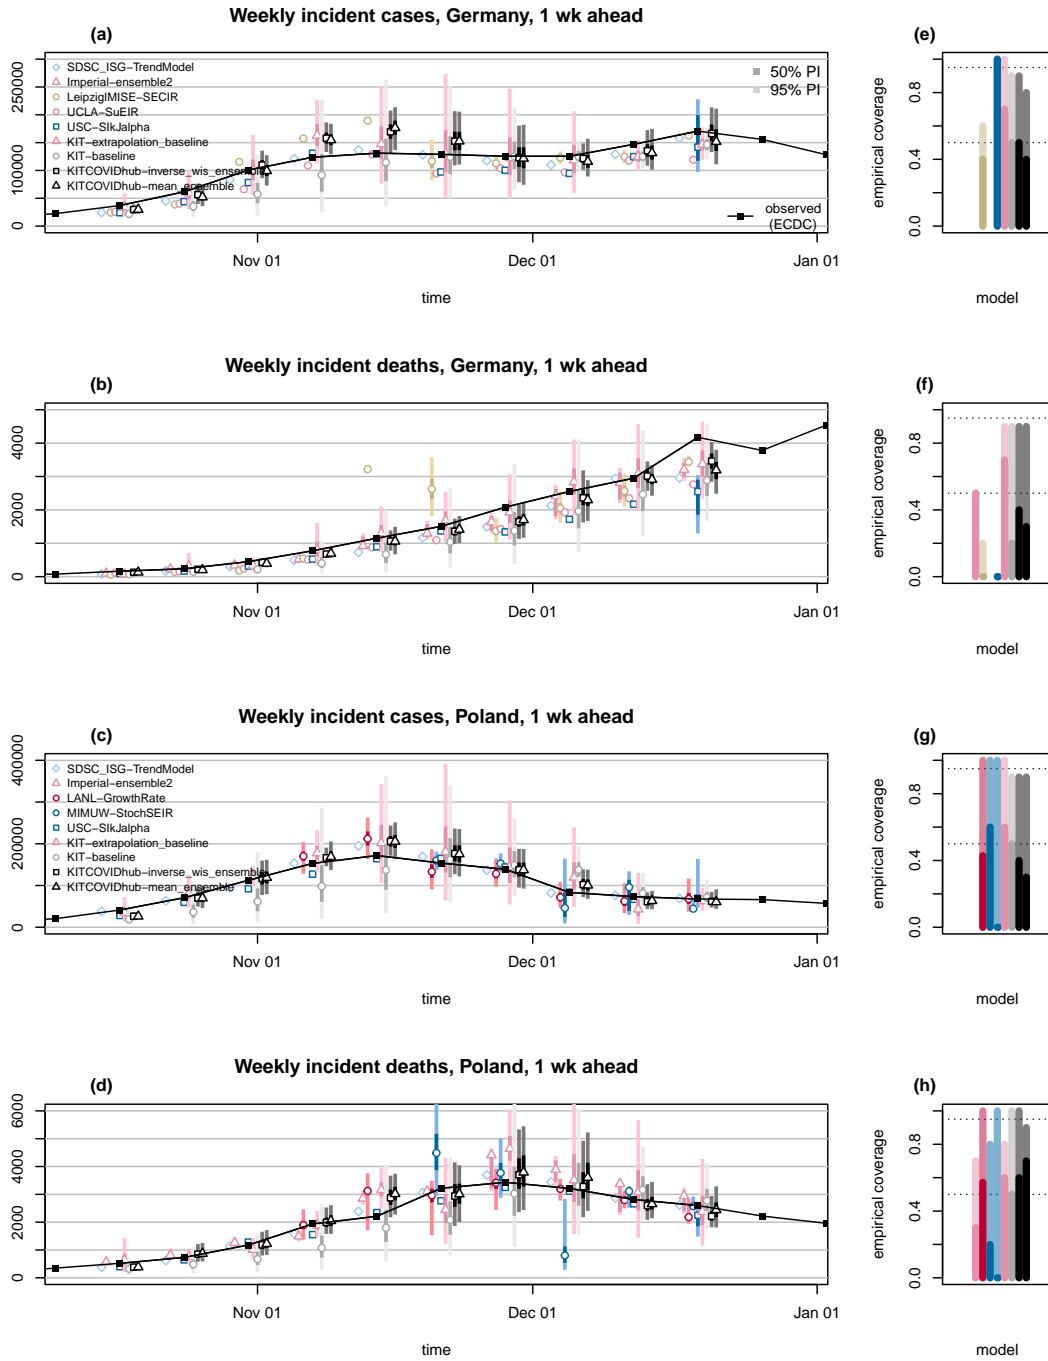

Supplementary Figure 3: **Additional one-week-ahead forecasts.** One-week-ahead forecasts of incident cases and deaths in Germany (a, b) and Poland (c, d). Displayed are predictive medians, 50% and 95% prediction intervals (PIs) for models not shown in Figure 2. Coverage plots (e–h) show the empirical coverage of 95% (light) and 50% (dark) prediction intervals.

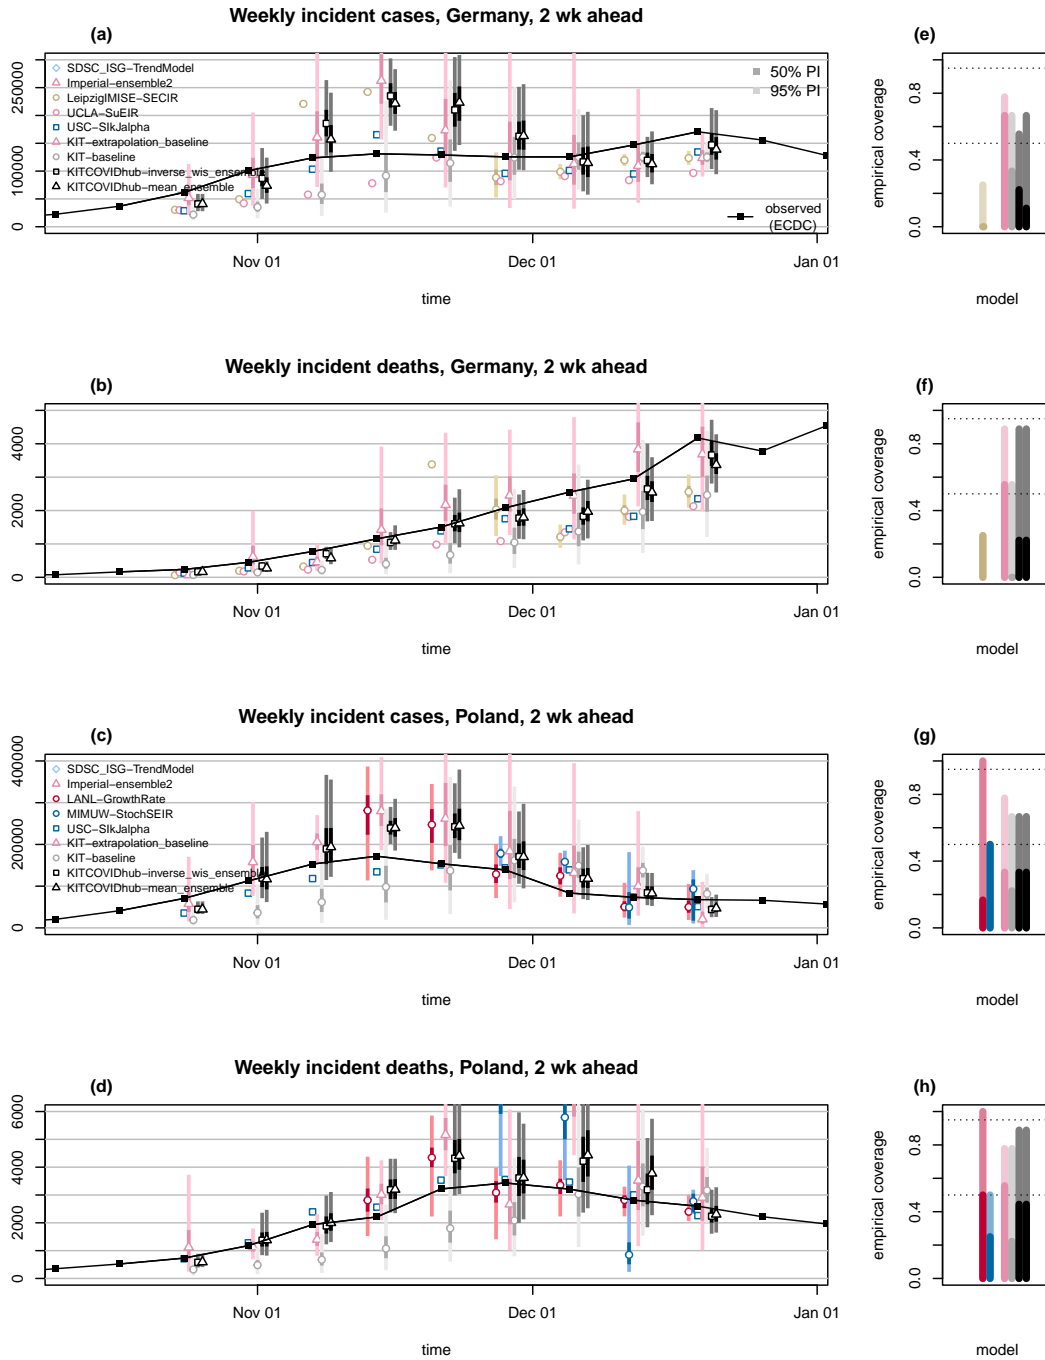

Supplementary Figure 4: **Additional two-week-ahead forecasts.** Two-week-ahead forecasts of incident cases and deaths in Germany (a, b) and Poland (c, d). Displayed are predictive medians, 50% and 95% prediction intervals (PIs) for models not shown in Figure 3. Coverage plots (e–h) show the empirical coverage of 95% (light) and 50% (dark) prediction intervals.

Supplementary Table 2: Detailed summary of forecast evaluation for Germany (based on JHU data)

| Model                            | Germany, cases |         |                  |                   |                |         |                  |                   |                |        |                  |                   |                |        |                  |                   |
|----------------------------------|----------------|---------|------------------|-------------------|----------------|---------|------------------|-------------------|----------------|--------|------------------|-------------------|----------------|--------|------------------|-------------------|
|                                  | 1 wk ahead inc |         |                  |                   | 2 wk ahead inc |         |                  |                   | 1 wk ahead cum |        |                  |                   | 2 wk ahead cum |        |                  |                   |
|                                  | AE             | WIS     | C <sub>0.5</sub> | C <sub>0.95</sub> | AE             | WIS     | C <sub>0.5</sub> | C <sub>0.95</sub> | AE             | WIS    | C <sub>0.5</sub> | C <sub>0.95</sub> | AE             | WIS    | C <sub>0.5</sub> | C <sub>0.95</sub> |
| epiforecasts-EpiExpert           | 13,351         | 9,470   | 3/10             | 7/10              | 33,588         | 24,996  | 2/9              | 3/9               | 13,351         | 9,470  | 3/10             | 7/10              | 46,506         | 34,234 | 2/9              | 4/9               |
| epiforecasts-EpiNow2             | 9,879          | 6,413   | 6/10             | 8/10              | 35,103         | 26,003  | 4/9              | 6/9               | 9,879          | 6,413  | 6/10             | 8/10              | 43,106         | 31,285 | 5/9              | 7/9               |
| FIAS_FZJ-EpiGer                  | 7,377          | 4,720   | 5/10             | 10/10             | 29,886         | 20,438  | 4/9              | 7/9               | 14,775         | 9,326  | 3/10             | 7/10              | 38,614         | 27,427 | 4/9              | 6/9               |
| ITWW-county_repro                | 34,825         | 29,077  | 0/10             | 2/10              | 63,812         | 52,478  | 0/9              | 2/9               | 34,476         | 28,729 | 0/10             | 2/10              | 100,873        | 83,619 | 0/9              | 1/9               |
| LANL-GrowthRate                  | 38,679*        | 22,973* | 4/7              | 7/7               | 79,788*        | 43,165* | 2/6              | 6/6               | 39,734         | 27,405 | 4/10             | 7/10              | 120,334        | 81,370 | 2/9              | 5/9               |
| LeipzigIMISE-SECIR               | 20,064         |         | 1/5              | 3/5               | 51,576         |         | 0/4              | 1/4               | 36,089         | 31,838 | 0/10             | 1/10              | 93,828         | 84,209 | 1/9              | 2/9               |
| MIT_CovidAnalytics-DELPHI        | 40,959*        | 29,499* | 2/8              | 4/8               | 82,336*        | 63,549* | 0/7              | 2/7               | 14,173         |        |                  |                   |                |        |                  |                   |
| SDSC_ISG-TrendModel              | 14,173         |         |                  |                   | 50,970         |         |                  |                   | 28,331         |        |                  |                   | 76,523         |        |                  |                   |
| UCLA-SuEIR                       | 28,331         |         |                  |                   | 34,150         |         |                  |                   | 23,474         |        | 1/1              | 1/1               | 53,480         |        |                  |                   |
| USC-SIkJalpa                     | 21,935         |         | 1/1              | 1/1               | 34,150         |         |                  |                   | 23,474         |        | 1/1              | 1/1               | 53,480         |        |                  |                   |
| KIT-baseline                     | 21,980         | 15,006  | 4/10             | 8/10              | 35,913         | 28,029  | 3/9              | 5/9               | 21,980         | 15,006 | 4/10             | 8/10              | 53,840         | 42,428 | 3/9              | 5/9               |
| KIT-extrapolation_baseline       | 12,851         | 10,487  | 7/10             | 10/10             | 37,194         | 26,323  | 5/9              | 7/9               | 12,851         | 10,487 | 7/10             | 10/10             | 47,861         | 34,846 | 7/9              | 7/9               |
| KIT-time_series_baseline         | 14,910         | 10,950  | 6/10             | 9/10              | 43,955         | 28,311  | 5/9              | 8/9               | 14,910         | 10,950 | 6/10             | 9/10              | 59,721         | 38,684 | 4/9              | 8/9               |
| KITCOVIDhub-inverse_wis_ensemble | 14,205         | 8,992   | 3/10             | 9/10              | 42,759         | 27,897  | 1/9              | 6/9               | 13,525         | 8,813  | 4/10             | 8/10              | 53,689         | 34,975 | 2/9              | 7/9               |
| KITCOVIDhub-mean_ensemble        | 17,484         | 10,712  | 3/10             | 8/10              | 42,910         | 27,776  | 2/9              | 6/9               | 16,171         | 10,397 | 3/10             | 7/10              | 57,842         | 37,415 | 1/9              | 6/9               |
| KITCOVIDhub-median_ensemble      | 12,271         | 8,001   | 4/10             | 9/10              | 38,316         | 25,784  | 3/9              | 7/9               | 13,277         | 8,962  | 4/10             | 7/10              | 50,155         | 34,504 | 2/9              | 6/9               |

  

| Model                            | Germany, deaths |      |                  |                   |                |      |                  |                   |                |       |                  |                   |                |       |                  |                   |
|----------------------------------|-----------------|------|------------------|-------------------|----------------|------|------------------|-------------------|----------------|-------|------------------|-------------------|----------------|-------|------------------|-------------------|
|                                  | 1 wk ahead inc  |      |                  |                   | 2 wk ahead inc |      |                  |                   | 1 wk ahead cum |       |                  |                   | 2 wk ahead cum |       |                  |                   |
|                                  | AE              | WIS  | C <sub>0.5</sub> | C <sub>0.95</sub> | AE             | WIS  | C <sub>0.5</sub> | C <sub>0.95</sub> | AE             | WIS   | C <sub>0.5</sub> | C <sub>0.95</sub> | AE             | WIS   | C <sub>0.5</sub> | C <sub>0.95</sub> |
| epiforecasts-EpiExpert           | 236             | 156  | 4/10             | 7/10              | 390            | 268  | 3/9              | 6/9               | 236            | 156   | 4/10             | 7/10              | 545            | 350   | 2/9              | 7/9               |
| epiforecasts-EpiNow2             | 159             | 108  | 5/10             | 8/10              | 357            | 218  | 4/9              | 7/9               | 159            | 108   | 5/10             | 8/10              | 485            | 296   | 5/9              | 7/9               |
| FIAS_FZJ-EpiGer                  | 307             | 268  | 2/10             | 4/10              | 579            | 484  | 1/9              | 3/9               | 244            | 206   | 0/10             | 3/10              | 779            | 655   | 2/9              | 4/9               |
| Imperial-ensemble2               | 306             | 225  | 2/10             | 5/10              |                |      |                  |                   | 303            | 222   | 2/10             | 5/10              |                |       |                  |                   |
| ITWW-county_repro                | 420             | 403  | 0/10             | 2/10              | 594            | 536  | 0/9              | 1/9               | 419            | 402   | 0/10             | 2/10              | 924            | 852   | 0/9              | 2/9               |
| LANL-GrowthRate                  | 234*            | 148* | 4/7              | 7/7               | 500*           | 353* | 2/6              | 5/6               | 218            | 149   | 4/10             | 7/10              | 658            | 493   | 3/9              | 5/9               |
| LeipzigIMISE-SECIR               | 653             |      | 0/5              | 1/5               | 815            |      | 1/4              | 1/4               | 1,199          | 1,024 | 0/10             | 1/10              | 2,247          | 1,867 | 0/9              | 1/9               |
| MIT_CovidAnalytics-DELPHI        | 499*            | 378* | 2/8              | 3/8               | 401*           | 313* | 1/7              | 5/7               | 473*           | 353*  | 2/8              | 3/8               | 635*           | 533*  | 1/7              | 3/7               |
| SDSC_ISG-TrendModel              | 409             |      |                  |                   | 884            |      |                  |                   | 409            |       |                  |                   | 1,281          |       |                  |                   |
| UCLA-SuEIR                       | 508             |      |                  |                   | 657            |      |                  |                   | 552            |       | 0/1              | 0/1               | 1,066          |       |                  |                   |
| USC-SIkJalpa                     | 540             |      | 0/1              | 0/1               | 892            |      |                  |                   | 531            |       | 0/10             | 9/10              | 1,258          |       |                  |                   |
| KIT-baseline                     | 531             | 291  | 0/10             | 9/10              | 892            | 554  | 0/9              | 5/9               | 531            | 291   | 0/10             | 9/10              | 1,258          | 789   | 0/9              | 5/9               |
| KIT-extrapolation_baseline       | 181             | 135  | 7/10             | 9/10              | 385            | 244  | 5/9              | 8/9               | 181            | 135   | 7/10             | 9/10              | 483            | 319   | 6/9              | 8/9               |
| KIT-time_series_baseline         | 213             | 179  | 6/10             | 9/10              | 592            | 402  | 4/9              | 8/9               | 213            | 179   | 6/10             | 9/10              | 803            | 547   | 4/9              | 8/9               |
| KITCOVIDhub-inverse_wis_ensemble | 218             | 142  | 2/10             | 8/10              | 302            | 178  | 1/9              | 8/9               | 214            | 136   | 2/10             | 8/10              | 474            | 279   | 1/9              | 6/9               |
| KITCOVIDhub-mean_ensemble        | 256             | 168  | 1/10             | 9/10              | 345            | 206  | 2/9              | 8/9               | 267            | 177   | 2/10             | 9/10              | 544            | 324   | 1/9              | 8/9               |
| KITCOVIDhub-median_ensemble      | 251             | 165  | 2/10             | 8/10              | 381            | 251  | 2/9              | 7/9               | 242            | 159   | 3/10             | 8/10              | 543            | 330   | 2/9              | 8/9               |

Supplementary Table 3: Detailed summary of forecast evaluation for Poland (based on JHU data)

| Model                            | Poland, cases  |         |                  |                   |                |         |                  |                   |                |        |                  |                   |                |        |                  |                   |
|----------------------------------|----------------|---------|------------------|-------------------|----------------|---------|------------------|-------------------|----------------|--------|------------------|-------------------|----------------|--------|------------------|-------------------|
|                                  | 1 wk ahead inc |         |                  |                   | 2 wk ahead inc |         |                  |                   | 1 wk ahead cum |        |                  |                   | 2 wk ahead cum |        |                  |                   |
|                                  | AE             | WIS     | C <sub>0.5</sub> | C <sub>0.95</sub> | AE             | WIS     | C <sub>0.5</sub> | C <sub>0.95</sub> | AE             | WIS    | C <sub>0.5</sub> | C <sub>0.95</sub> | AE             | WIS    | C <sub>0.5</sub> | C <sub>0.95</sub> |
| epiforecasts-EpiExpert           | 16,105         | 11,390  | 4/10             | 8/10              | 41,186         | 27,900  | 1/9              | 5/9               | 16,128         | 11,414 | 4/10             | 8/10              | 59,079         | 38,550 | 1/9              | 6/9               |
| epiforecasts-EpiNow2             | 9,147          | 6,587   | 7/10             | 7/10              | 36,477         | 24,085  | 2/9              | 6/9               | 9,170          | 6,594  | 7/10             | 7/10              | 42,849         | 28,105 | 6/9              | 7/9               |
| ICM-agentModel                   |                |         | 2/4              | 4/4               |                |         | 0/3              | 1/3               |                |        | 1/4              | 3/4               |                |        | 0/3              | 2/3               |
| ITWW-county_repro                | 19,441         | 16,205  | 1/10             | 4/10              | 37,152         | 30,879  | 2/9              | 2/9               | 18,519         | 15,278 | 1/10             | 3/10              | 57,467         | 46,975 | 1/9              | 3/9               |
| LANL-GrowthRate                  | 13,494*        | 8,719*  | 5/7              | 7/7               | 48,693*        | 27,686* | 1/6              | 6/6               | 15,205         | 10,151 | 5/10             | 8/10              | 66,280         | 39,924 | 2/9              | 8/9               |
| MIMUW-StochSEIR                  |                |         | 3/5              | 4/5               |                |         | 2/4              | 2/4               |                |        | 2/5              | 4/5               |                |        | 1/4              | 2/4               |
| MIT_CovidAnalytics-DELPHI        | 30,505*        | 22,627* | 3/9              | 5/9               | 61,303*        | 46,360* | 1/8              | 4/8               | 15,732         | 11,468 | 1/10             | 4/10              | 46,214         | 35,642 | 1/9              | 3/9               |
| MOCOS-agent1                     | 15,732         | 11,468  | 1/10             | 4/10              | 32,235         | 26,111  | 1/9              | 3/9               | 10,888         |        |                  |                   |                |        |                  |                   |
| SDSC_ISG-TrendModel              | 10,817         |         |                  |                   |                |         |                  |                   | 16,754         |        |                  |                   |                |        |                  |                   |
| USC-SIkIalpha                    | 13,544         |         | 0/1              | 1/1               | 27,115         |         |                  |                   |                |        | 0/1              | 1/1               | 41,949         |        |                  |                   |
| KIT-baseline                     | 31,605         | 20,001  | 5/10             | 9/10              | 55,931         | 37,396  | 2/9              | 6/9               | 31,676         | 20,036 | 5/10             | 9/10              | 87,597         | 59,162 | 2/9              | 6/9               |
| KIT-extrapolation_baseline       | 18,333         | 11,754  | 7/10             | 10/10             | 55,685         | 34,091  | 3/9              | 8/9               | 18,311         | 11,752 | 7/10             | 10/10             | 77,269         | 45,119 | 3/9              | 9/9               |
| KIT-time-series_baseline         | 22,502         | 14,455  | 5/10             | 10/10             | 60,704         | 38,643  | 4/9              | 9/9               | 22,480         | 14,452 | 5/10             | 10/10             | 85,192         | 53,310 | 4/9              | 9/9               |
| KITCOVIDhub-inverse.wis.ensemble | 14,191         | 9,103   | 5/10             | 8/10              | 37,174         | 25,943  | 3/9              | 6/9               | 14,325         | 8,838  | 5/10             | 8/10              | 50,096         | 33,472 | 2/9              | 6/9               |
| KITCOVIDhub-mean.ensemble        | 13,849         | 8,879   | 4/10             | 9/10              | 37,831         | 24,819  | 2/9              | 6/9               | 14,511         | 8,727  | 5/10             | 8/10              | 50,731         | 32,216 | 2/9              | 7/9               |
| KITCOVIDhub-median.ensemble      | 15,236         | 9,529   | 6/10             | 9/10              | 40,453         | 25,715  | 2/9              | 6/9               | 16,541         | 10,105 | 4/10             | 8/10              | 55,827         | 34,268 | 1/9              | 5/9               |

  

| Model                            | Poland, deaths |      |                  |                   |                |        |                  |                   |                |      |                  |                   |                |        |                  |                   |
|----------------------------------|----------------|------|------------------|-------------------|----------------|--------|------------------|-------------------|----------------|------|------------------|-------------------|----------------|--------|------------------|-------------------|
|                                  | 1 wk ahead inc |      |                  |                   | 2 wk ahead inc |        |                  |                   | 1 wk ahead cum |      |                  |                   | 2 wk ahead cum |        |                  |                   |
|                                  | AE             | WIS  | C <sub>0.5</sub> | C <sub>0.95</sub> | AE             | WIS    | C <sub>0.5</sub> | C <sub>0.95</sub> | AE             | WIS  | C <sub>0.5</sub> | C <sub>0.95</sub> | AE             | WIS    | C <sub>0.5</sub> | C <sub>0.95</sub> |
| epiforecasts-EpiExpert           | 303            | 186  | 3/10             | 9/10              | 625            | 399    | 2/9              | 7/9               | 303            | 186  | 3/10             | 9/10              | 911            | 571    | 2/9              | 8/9               |
| epiforecasts-EpiNow2             | 343            | 240  | 5/10             | 7/10              | 1,066          | 758    | 3/9              | 5/9               | 344            | 240  | 5/10             | 7/10              | 1,439          | 1,003  | 3/9              | 5/9               |
| ICM-agentModel                   | 808*           | 715* | 1/8              | 2/8               | 1,921*         | 1,272* | 0/7              | 2/7               | 1,234*         | 770* | 0/8              | 3/8               | 3,000*         | 1,904* | 0/7              | 4/7               |
| Imperial-ensemble2               | 379            | 229  | 6/10             | 7/10              |                |        |                  |                   | 351            | 200  | 6/10             | 7/10              |                |        |                  |                   |
| ITWW-county_repro                | 465            | 428  | 1/10             | 1/10              | 652            | 560    | 0/9              | 2/9               | 458            | 422  | 2/10             | 2/10              | 1,099          | 968    | 0/9              | 3/9               |
| LANL-GrowthRate                  | 236*           | 158* | 4/7              | 7/7               | 383*           | 235*   | 4/6              | 6/6               | 236            | 154  | 4/10             | 9/10              | 655            | 420    | 3/9              | 8/9               |
| MIMUW-StochSEIR                  |                |      | 2/5              | 4/5               |                |        | 1/4              | 2/4               |                |      | 2/5              | 4/5               |                |        | 0/4              | 4/4               |
| MIT_CovidAnalytics-DELPHI        | 467*           | 299* | 2/9              | 7/9               | 621*           | 409*   | 1/8              | 6/8               | 552*           | 386* | 2/9              | 7/9               | 990*           | 705*   | 1/8              | 4/8               |
| MOCOS-agent1                     | 205            | 153  | 8/10             | 10/10             | 393            | 253    | 5/9              | 8/9               | 205            | 153  | 8/10             | 10/10             | 533            | 359    | 7/9              | 9/9               |
| SDSC_ISG-TrendModel              | 180            |      |                  |                   |                |        |                  |                   | 179            |      |                  |                   |                |        |                  |                   |
| USC-SIkIalpha                    | 202            |      | 0/1              | 1/1               | 212            |        |                  |                   | 252            |      | 0/1              | 0/1               | 283            |        |                  |                   |
| KIT-baseline                     | 504            | 305  | 5/10             | 10/10             | 882            | 578    | 2/9              | 6/9               | 503            | 304  | 5/10             | 10/10             | 1,365          | 896    | 2/9              | 5/9               |
| KIT-extrapolation_baseline       | 412            | 274  | 6/10             | 8/10              | 995            | 700    | 5/9              | 7/9               | 411            | 274  | 6/10             | 8/10              | 1,422          | 974    | 4/9              | 7/9               |
| KIT-time-series_baseline         | 528            | 333  | 8/10             | 10/10             | 1,343          | 853    | 5/9              | 8/9               | 529            | 333  | 8/10             | 10/10             | 1,909          | 1,206  | 5/9              | 8/9               |
| KITCOVIDhub-inverse.wis.ensemble | 207            | 138  | 7/10             | 10/10             | 476            | 300    | 4/9              | 9/9               | 231            | 151  | 7/10             | 10/10             | 683            | 433    | 4/9              | 8/9               |
| KITCOVIDhub-mean.ensemble        | 227            | 147  | 7/10             | 10/10             | 558            | 349    | 4/9              | 9/9               | 250            | 158  | 6/10             | 10/10             | 793            | 500    | 4/9              | 8/9               |
| KITCOVIDhub-median.ensemble      | 195            | 134  | 6/10             | 10/10             | 460            | 278    | 4/9              | 9/9               | 215            | 147  | 6/10             | 10/10             | 686            | 433    | 4/9              | 8/9               |

Supplementary Table 4: Summary of forecast evaluation for ensembles without plausibility checks of members (based on ECDC data)

| Model                                | Germany, cases  |       |                  |                   |                |        |                  |                   |                |        |                  |                   |                |        |                  |                   |
|--------------------------------------|-----------------|-------|------------------|-------------------|----------------|--------|------------------|-------------------|----------------|--------|------------------|-------------------|----------------|--------|------------------|-------------------|
|                                      | 1 wk ahead inc  |       |                  |                   | 2 wk ahead inc |        |                  |                   | 1 wk ahead cum |        |                  |                   | 2 wk ahead cum |        |                  |                   |
|                                      | AE              | WIS   | C <sub>0.5</sub> | C <sub>0.95</sub> | AE             | WIS    | C <sub>0.5</sub> | C <sub>0.95</sub> | AE             | WIS    | C <sub>0.5</sub> | C <sub>0.95</sub> | AE             | WIS    | C <sub>0.5</sub> | C <sub>0.95</sub> |
| KITCOVIDhub-inverse_wis_ensemble_all | 13,431          | 8,835 | 4/10             | 9/10              | 39,275         | 24,810 | 1/9              | 6/9               | 28,345         | 18,730 | 1/10             | 7/10              | 55,290         | 35,321 | 2/9              | 7/9               |
| KITCOVIDhub-mean_ensemble_all        | 15,554          | 9,848 | 4/10             | 9/10              | 40,120         | 24,956 | 1/9              | 6/9               | 16,068         | 10,397 | 4/10             | 7/10              | 54,550         | 34,516 | 2/9              | 6/9               |
| KITCOVIDhub-median_ensemble_all      | 11,240          | 7,959 | 6/10             | 9/10              | 36,823         | 23,838 | 3/9              | 7/9               | 13,511         | 9,593  | 6/10             | 7/10              | 51,242         | 35,038 | 2/9              | 6/9               |
|                                      | Germany, deaths |       |                  |                   |                |        |                  |                   |                |        |                  |                   |                |        |                  |                   |
| Model                                | 1 wk ahead inc  |       |                  |                   | 2 wk ahead inc |        |                  |                   | 1 wk ahead cum |        |                  |                   | 2 wk ahead cum |        |                  |                   |
| KITCOVIDhub-inverse_wis_ensemble_all | 177             | 109   | 6/10             | 9/10              | 234            | 144    | 4/9              | 8/9               | 845            | 665    | 0/10             | 8/10              | 1,065          | 742    | 1/9              | 8/9               |
| KITCOVIDhub-mean_ensemble_all        | 183             | 124   | 6/10             | 8/10              | 263            | 162    | 4/9              | 8/9               | 236            | 157    | 4/10             | 6/10              | 472            | 291    | 3/9              | 6/9               |
| KITCOVIDhub-median_ensemble_all      | 185             | 129   | 6/10             | 8/10              | 332            | 217    | 3/9              | 7/9               | 196            | 132    | 4/10             | 7/10              | 434            | 270    | 3/9              | 7/9               |
|                                      | Poland, cases   |       |                  |                   |                |        |                  |                   |                |        |                  |                   |                |        |                  |                   |
| Model                                | 1 wk ahead inc  |       |                  |                   | 2 wk ahead inc |        |                  |                   | 1 wk ahead cum |        |                  |                   | 2 wk ahead cum |        |                  |                   |
| KITCOVIDhub-inverse_wis_ensemble_all | 12,100          | 8,065 | 4/10             | 9/10              | 36,692         | 23,049 | 3/9              | 7/9               | 11,951         | 7,300  | 5/10             | 10/10             | 44,256         | 28,051 | 2/9              | 8/9               |
| KITCOVIDhub-mean_ensemble_all        | 11,788          | 7,847 | 4/10             | 9/10              | 37,031         | 22,548 | 2/9              | 8/9               | 11,649         | 7,076  | 5/10             | 10/10             | 43,910         | 27,625 | 3/9              | 9/9               |
| KITCOVIDhub-median_ensemble_all      | 13,597          | 8,632 | 5/10             | 9/10              | 39,156         | 23,726 | 2/9              | 7/9               | 13,365         | 8,415  | 5/10             | 9/10              | 48,278         | 28,472 | 3/9              | 7/9               |
|                                      | Poland, deaths  |       |                  |                   |                |        |                  |                   |                |        |                  |                   |                |        |                  |                   |
| Model                                | 1 wk ahead inc  |       |                  |                   | 2 wk ahead inc |        |                  |                   | 1 wk ahead cum |        |                  |                   | 2 wk ahead cum |        |                  |                   |
| KITCOVIDhub-inverse_wis_ensemble_all | 188             | 141   | 6/10             | 10/10             | 467            | 295    | 5/9              | 9/9               | 384            | 241    | 2/10             | 9/10              | 656            | 406    | 5/9              | 9/9               |
| KITCOVIDhub-mean_ensemble_all        | 204             | 147   | 7/10             | 9/10              | 593            | 353    | 4/9              | 9/9               | 220            | 154    | 7/10             | 9/10              | 802            | 485    | 3/9              | 9/9               |
| KITCOVIDhub-median_ensemble_all      | 202             | 138   | 6/10             | 10/10             | 428            | 272    | 6/9              | 9/9               | 194            | 135    | 8/10             | 10/10             | 620            | 404    | 6/9              | 9/9               |

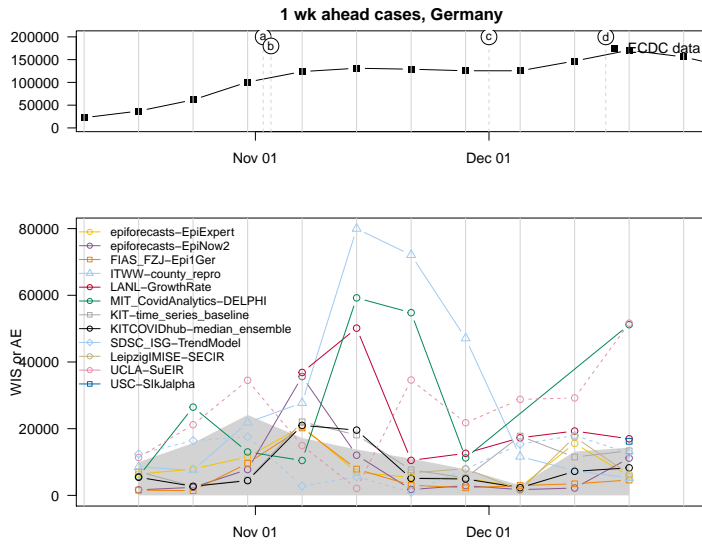

Supplementary Figure 5: WIS value or absolute error (of deterministic models) over time, for one-week-ahead case forecasts for Germany. Letters in circles represent events explained in Figure 1. As in Figure 7, the upper border of the light grey area represents the performance of the naïve baseline model KIT-baseline.

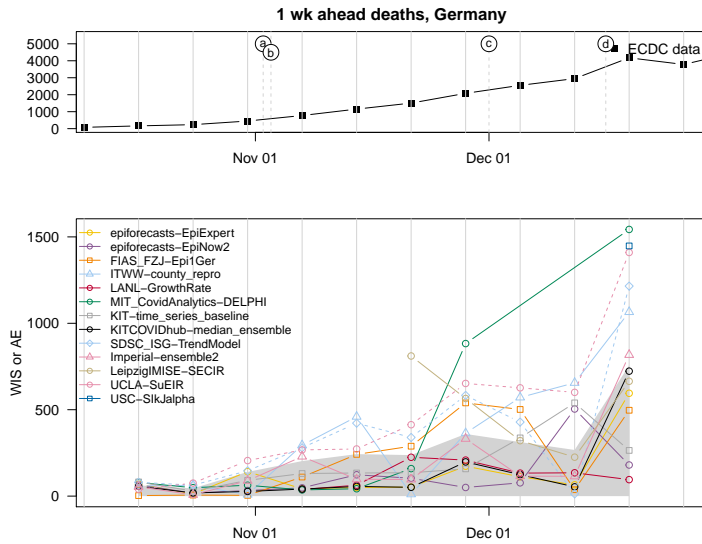

Supplementary Figure 6: WIS value or absolute error (of deterministic models) over time, for one-week-ahead death forecasts for Germany. Letters in circles represent events explained in Figure 1. As in Figure 7, the upper border of the light grey area represents the performance of the naïve baseline model KIT-baseline.



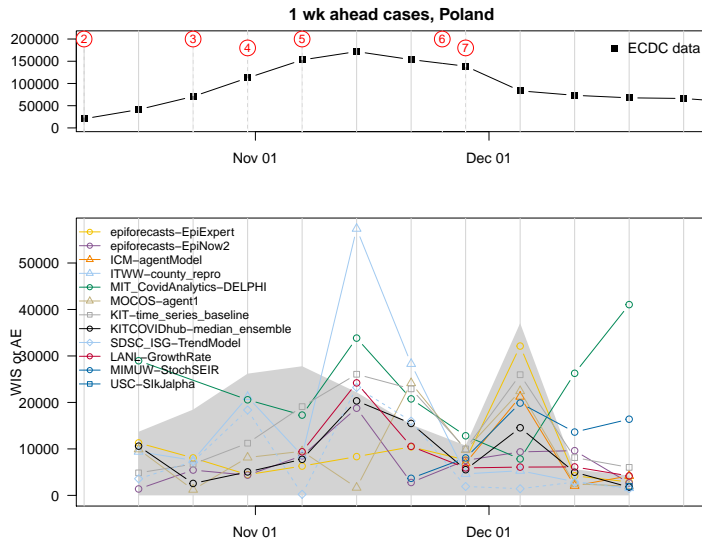

Supplementary Figure 7: WIS value or absolute error (of deterministic models) over time, for one-week-ahead case forecasts for Poland. Numbers in circles represent events explained in Figure 1. As in Figure 7, the upper border of the light grey area represents the performance of the naïve baseline model KIT-baseline.

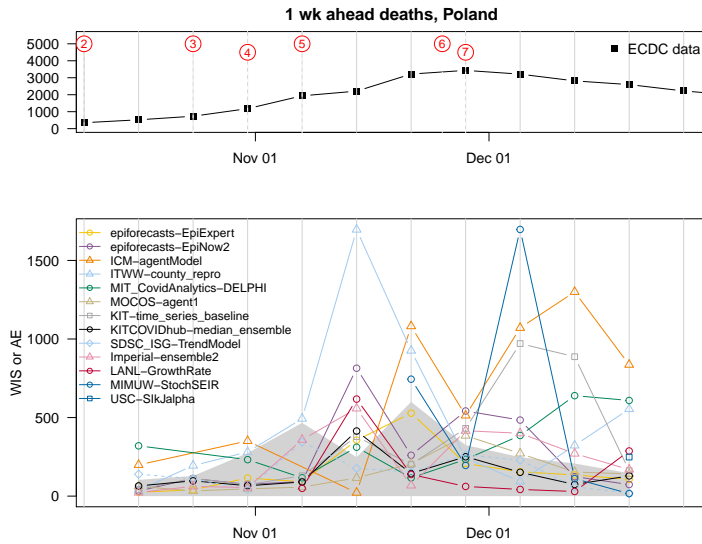

Supplementary Figure 8: WIS value or absolute error (of deterministic models) over time, for one-week-ahead death forecasts for Poland. Numbers in circles represent events explained in Figure 1. As in Figure 7, the upper border of the light grey area represents the performance of the naïve baseline model KIT-baseline.

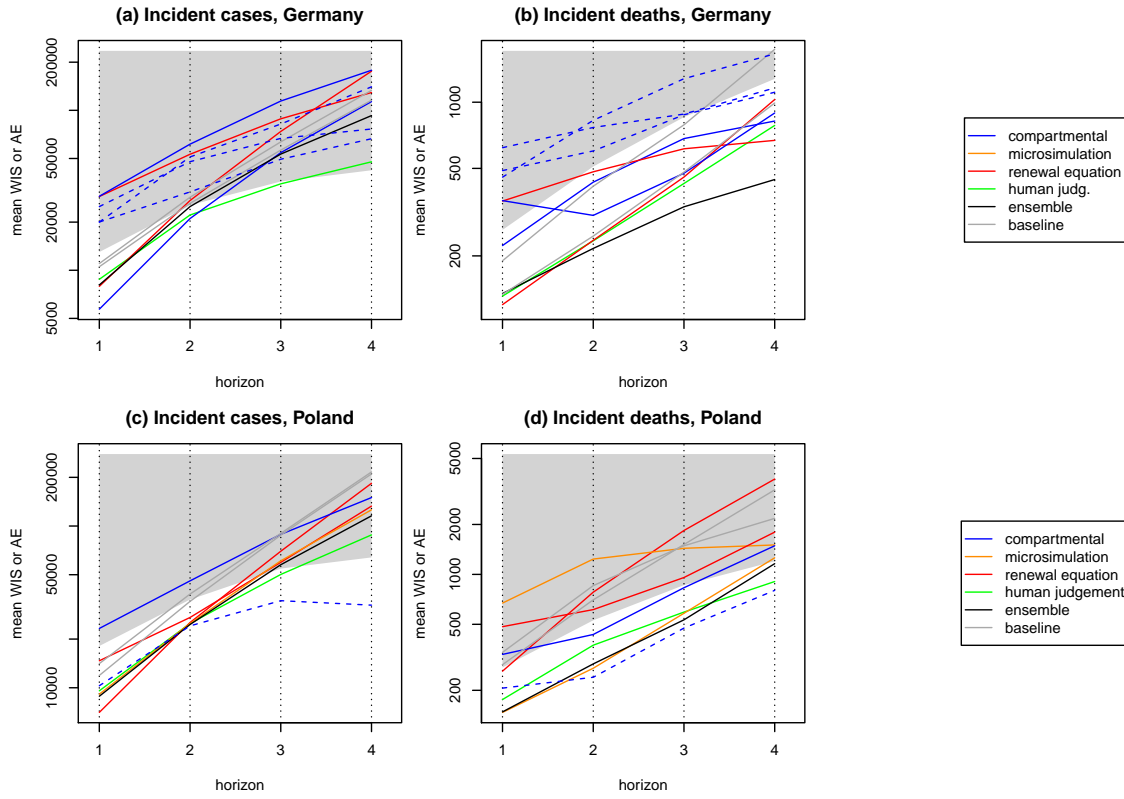

Supplementary Figure 9: Mean WIS or AE values by target and forecast horizon as in Figure 7. Lines are coloured according to the model categories introduced in Table 3. No clear patterns emerge apart from the fact that the ensemble model shows good relative performance for death forecasts.

# Supplementary Note 8 Results for three- and four-week-ahead forecasts

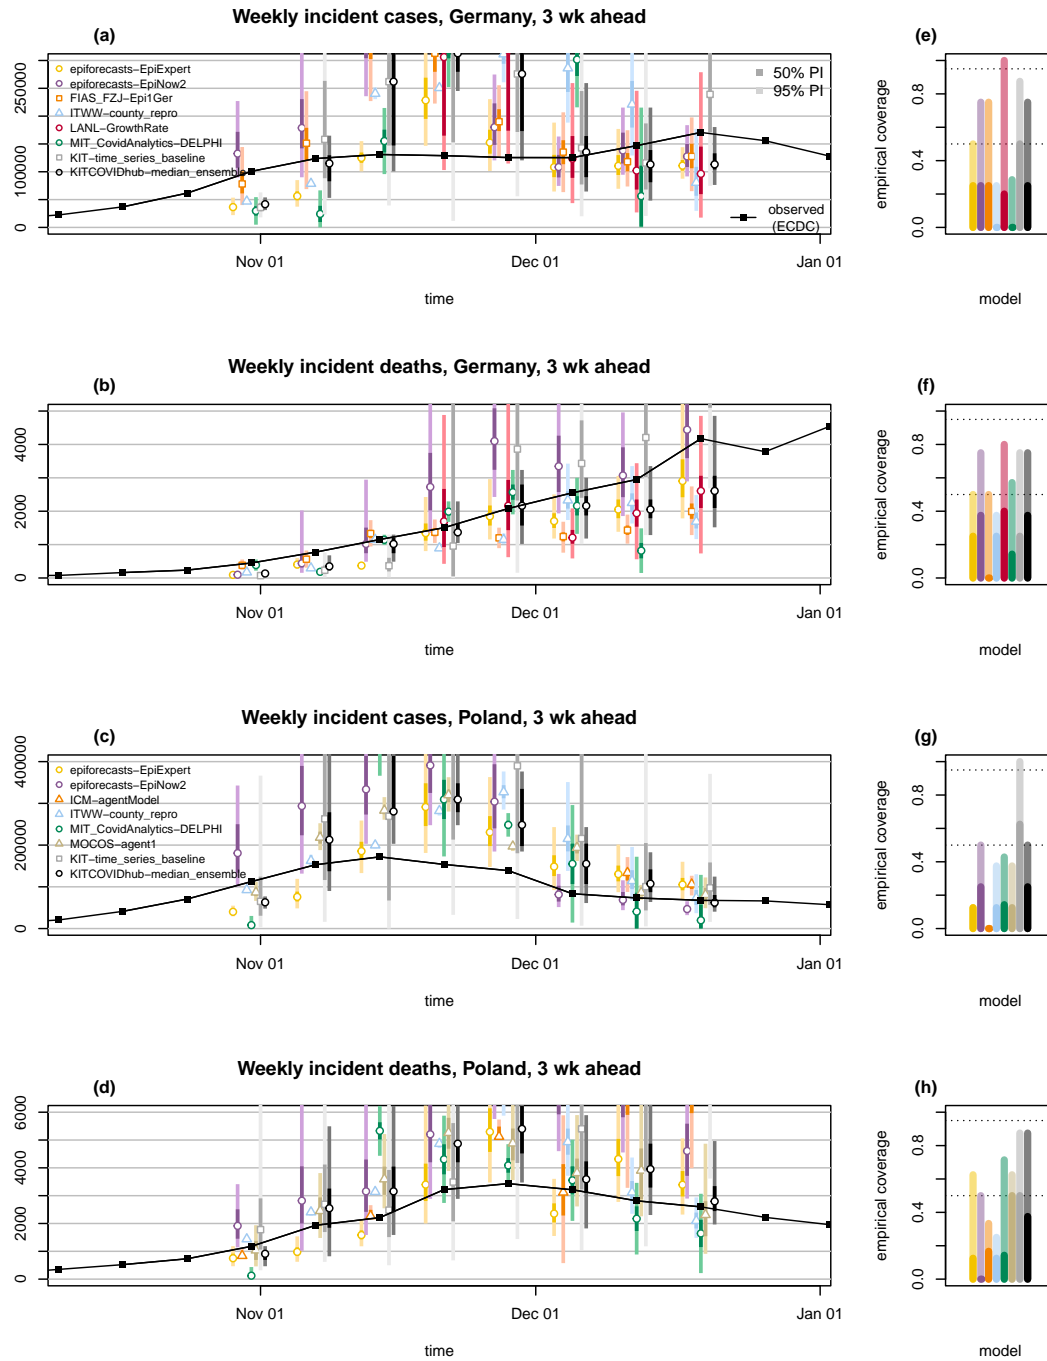

Supplementary Figure 10: **Three-week-ahead forecasts.** Three-week-ahead forecasts of incident cases and deaths in Germany (a, b) and Poland (c, d). Displayed are predictive medians, 50% and 95% prediction intervals (PIs). Coverage plots (e–h) show the empirical coverage of 95% (light) and 50% (dark) prediction intervals.

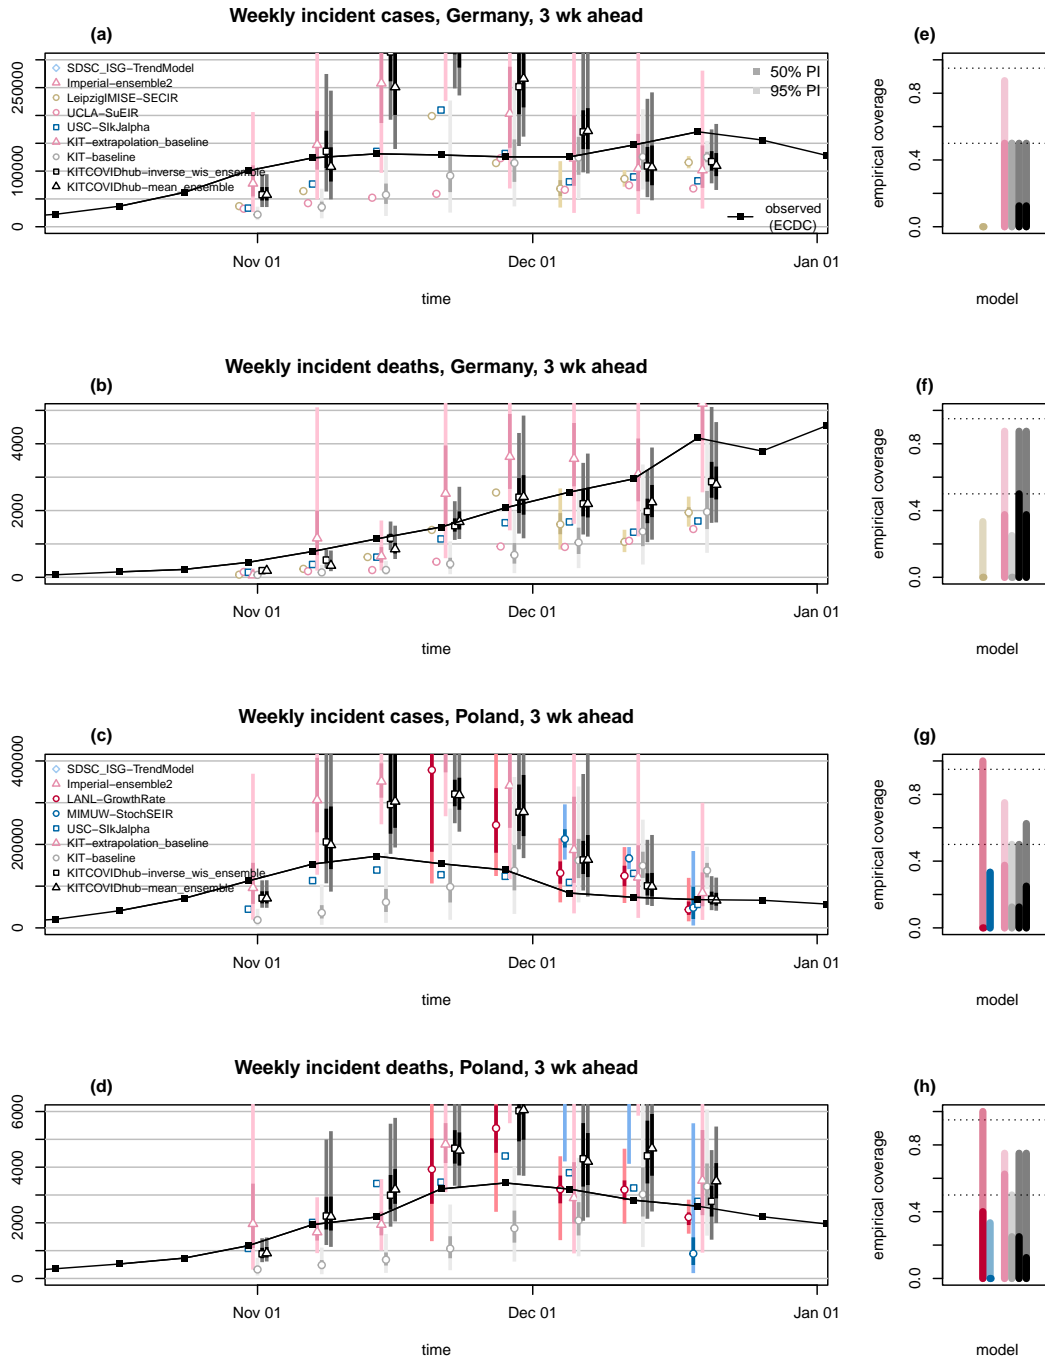

Supplementary Figure 11: **Additional three-week-ahead forecasts.** Three-week-ahead forecasts of incident cases and deaths in Germany (a, b) and Poland (c, d). Displayed are predictive medians, 50% and 95% prediction intervals (PIs) for models not shown in Figure 10. Coverage plots (e–h) show the empirical coverage of 95% (light) and 50% (dark) prediction intervals.

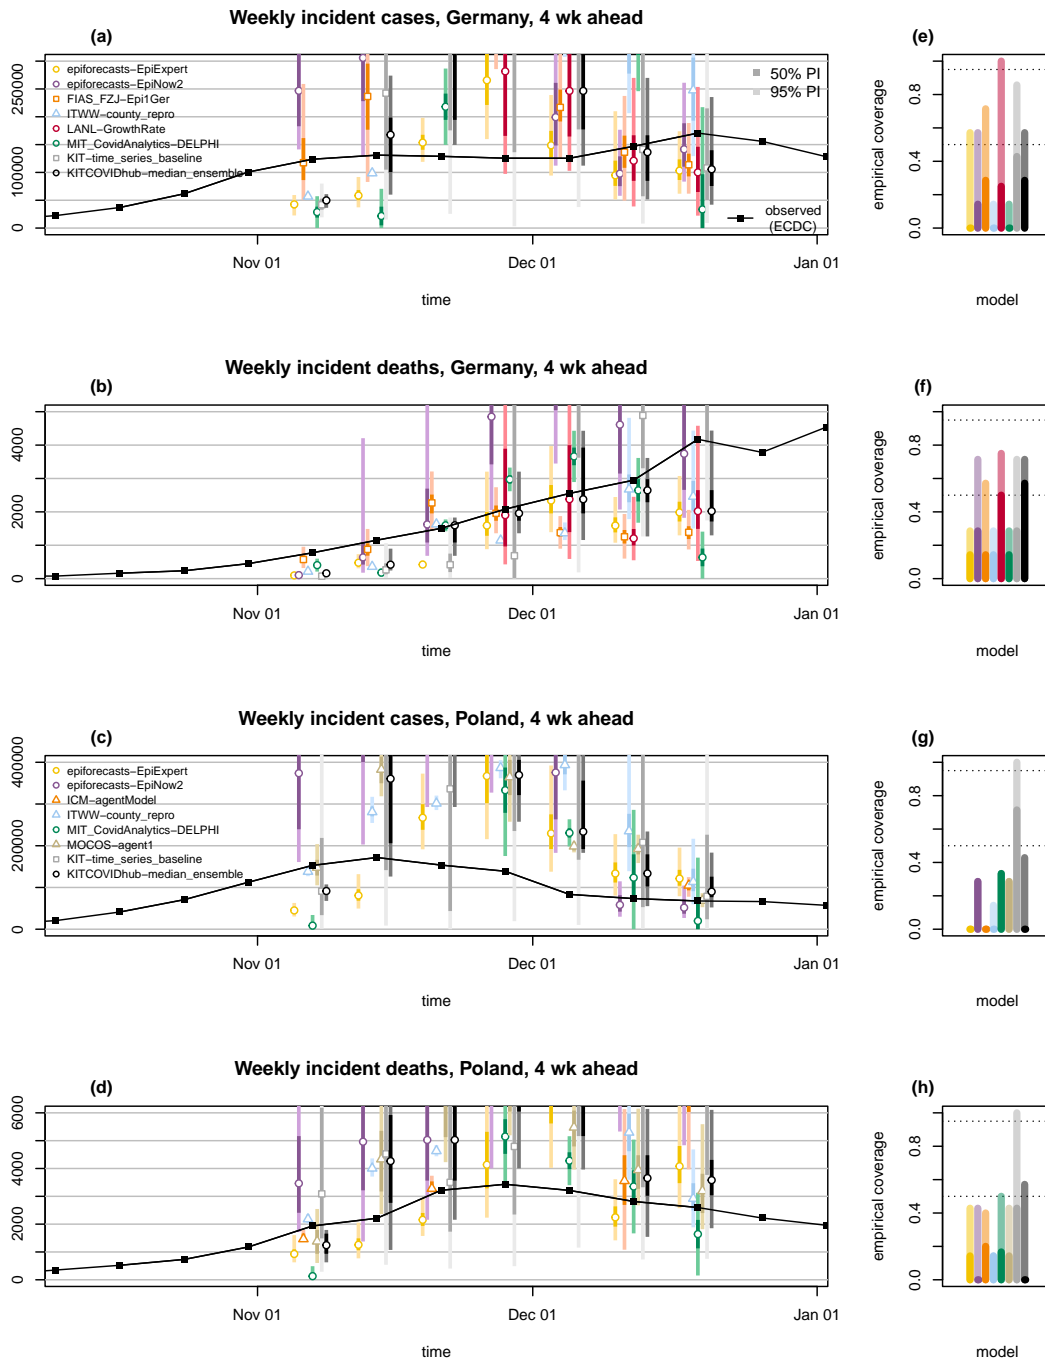

Supplementary Figure 12: **Four-week-ahead forecasts.** Four-week-ahead forecasts of incident cases and deaths in Germany (a, b) and Poland (c, d). Displayed are predictive medians, 50% and 95% prediction intervals (PIs). Coverage plots (e–h) show the empirical coverage of 95% (light) and 50% (dark) prediction intervals.

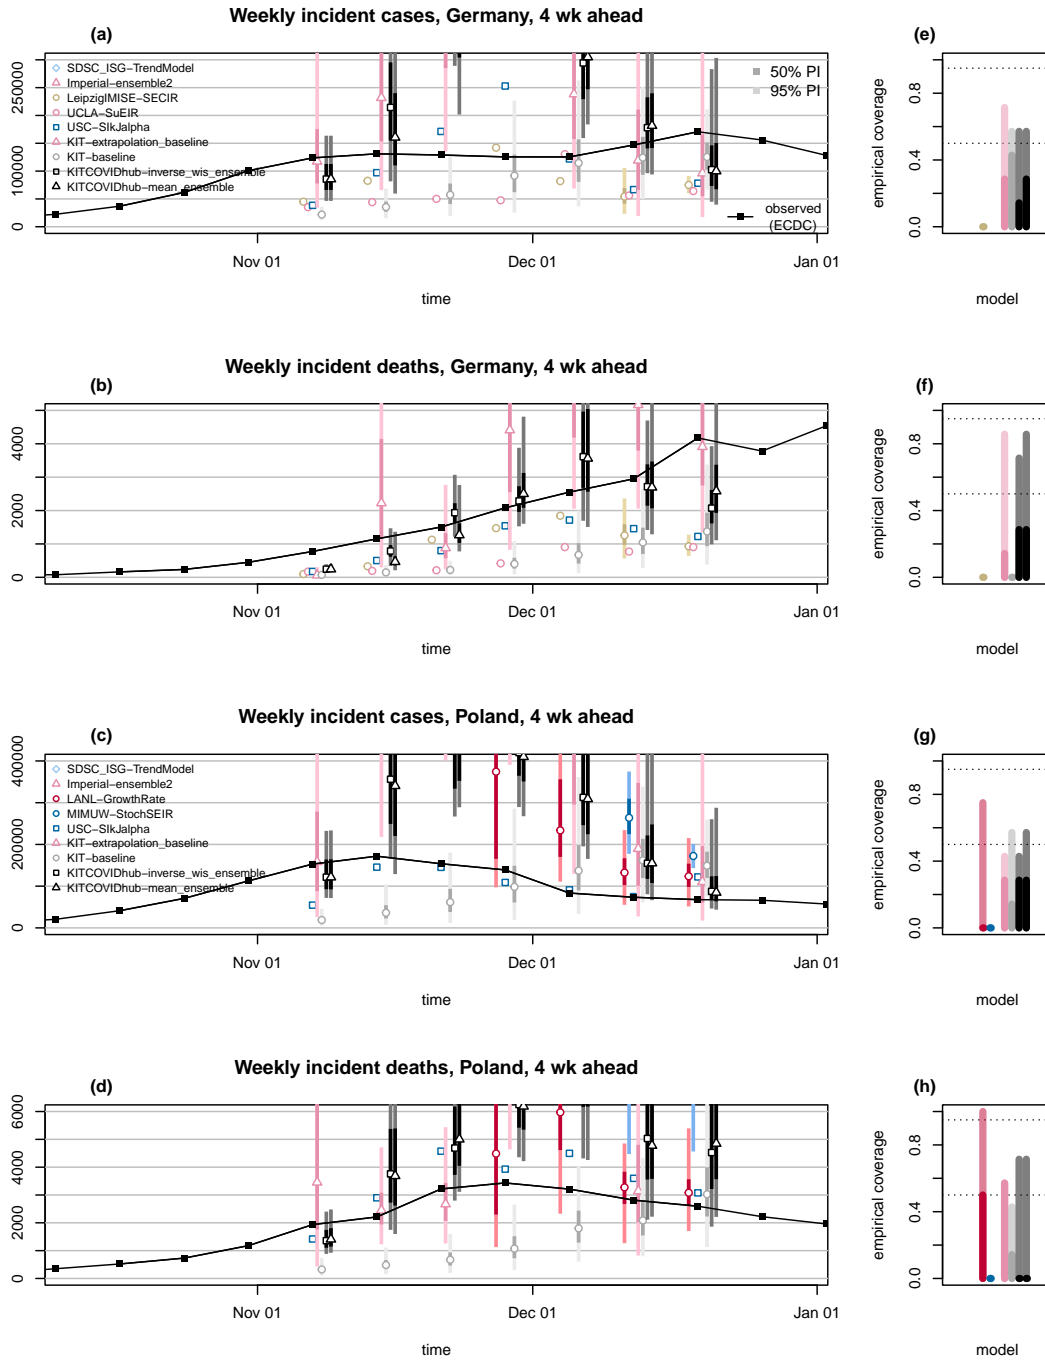

Supplementary Figure 13: **Additional four-week-ahead forecasts.** Four-week-ahead forecasts of incident cases and deaths in Germany (a, b) and Poland (c, d). Displayed are predictive medians, 50% and 95% prediction intervals (PIs) for models not shown in Figure 12. Coverage plots (e–h) show the empirical coverage of 95% (light) and 50% (dark) prediction intervals.

Supplementary Table 5: Detailed summary of forecast evaluation for Germany, 3 and 4 weeks ahead (based on ECDC data)

| Germany, cases                   |                |          |                  |                |         |                  |                |         |                  |                |         |                  |         |     |                   |
|----------------------------------|----------------|----------|------------------|----------------|---------|------------------|----------------|---------|------------------|----------------|---------|------------------|---------|-----|-------------------|
| Model                            | 3 wk ahead inc |          |                  | 4 wk ahead inc |         |                  | 3 wk ahead cum |         |                  | 4 wk ahead cum |         |                  |         |     |                   |
|                                  | AE             | WIS      | C <sub>0.5</sub> | AE             | WIS     | C <sub>0.5</sub> | AE             | WIS     | C <sub>0.5</sub> | AE             | WIS     | C <sub>0.5</sub> | AE      | WIS | C <sub>0.95</sub> |
| epiforecasts-EpiExpert           | 47,162         | 34,704   | 2/8              | 65,906         | 47,640  | 0/7              | 4/7            | 85,859  | 60,488           | 2/8            | 4/8     | 143,536          | 101,205 | 2/7 | 4/7               |
| epiforecasts-EpiNow2             | 98,948         | 73,773   | 2/8              | 235,461        | 175,688 | 1/7              | 4/7            | 148,866 | 109,915          | 3/8            | 6/8     | 394,730          | 293,483 | 1/7 | 5/7               |
| FIAS_FZJ-EpiGer                  | 74,550         | 54,378   | 2/8              | 149,451        | 113,410 | 2/7              | 5/7            | 116,086 | 84,710           | 4/8            | 6/8     | 271,463          | 203,058 | 2/7 | 4/7               |
| ITWW-county_repro                | 105,132        | 88,509   | 0/8              | 147,570        | 129,219 | 0/7              | 1/7            | 180,139 | 0/8              | 1/8            | 369,098 | 319,826          | 0/7     | 1/7 |                   |
| LANL-GrowthRate                  |                | 1/5      | 5/5              |                | 1/4     | 4/4              | 4/4            | 218,206 | 152,213          | 2/8            | 5/8     | 328,115          | 246,869 | 2/7 | 4/7               |
| LeipzigMISE-SECIR                | 82,104         | 0/3      | 0/3              | 140,275        | 0/2     | 0/2              | 0/2            | 171,325 | 153,731          | 1/8            | 2/8     | 296,564          | 267,098 | 2/7 | 2/7               |
| MIT-CovidAnalytics-DELPHI        | 139,142*       | 114,298* | 0/7              | 210,370        | 178,016 | 0/7              | 1/7            |         |                  |                |         |                  |         |     |                   |
| SDSC-ISC-TrendModel              |                |          |                  |                |         |                  |                |         |                  |                |         |                  |         |     |                   |
| UCLA-SuEIR                       | 66,768         |          |                  | 76,415         |         |                  |                | 132,374 |                  |                |         | 198,546          |         |     |                   |
| USC-SikJalapa                    | 49,446         |          |                  | 66,436         |         |                  |                | 96,902  |                  |                |         | 140,716          |         |     |                   |
| KIT-baseline                     | 44,706         | 35,891   | 4/8              | 54,563         | 42,192  | 3/7              | 4/7            | 85,838  | 70,756           | 3/8            | 4/8     | 136,280          | 115,148 | 2/7 | 4/7               |
| KIT-extrapolation_baseline       | 82,243         | 56,387   | 4/8              | 165,710        | 115,568 | 2/7              | 5/7            | 125,152 | 88,749           | 4/8            | 7/8     | 291,137          | 207,420 | 4/7 | 6/7               |
| KIT-time-series_baseline         | 91,848         | 63,486   | 4/8              | 162,293        | 133,341 | 3/7              | 6/7            | 154,663 | 103,058          | 3/8            | 7/8     | 320,671          | 239,590 | 3/7 | 6/7               |
| KITCOVIDhub-inverse_wis_ensemble | 90,487         | 65,207   | 1/8              | 171,254        | 126,851 | 1/7              | 4/7            | 136,583 | 93,984           | 3/8            | 5/8     | 278,362          | 206,835 | 3/7 | 5/7               |
| KITCOVIDhub-mean_ensemble        | 82,294         | 57,308   | 1/8              | 138,225        | 104,078 | 2/7              | 4/7            | 137,562 | 92,565           | 3/8            | 5/8     | 262,811          | 190,439 | 3/7 | 4/7               |
| KITCOVIDhub-median_ensemble      | 79,238         | 53,265   | 2/8              | 129,400        | 92,703  | 2/7              | 4/7            | 125,538 | 89,344           | 2/8            | 5/8     | 252,946          | 191,986 | 3/7 | 4/7               |

  

| Germany, deaths                  |                |      |                  |                |       |                  |                |        |                  |                |     |                  |       |     |                   |
|----------------------------------|----------------|------|------------------|----------------|-------|------------------|----------------|--------|------------------|----------------|-----|------------------|-------|-----|-------------------|
| Model                            | 3 wk ahead inc |      |                  | 4 wk ahead inc |       |                  | 3 wk ahead cum |        |                  | 4 wk ahead cum |     |                  |       |     |                   |
|                                  | AE             | WIS  | C <sub>0.5</sub> | AE             | WIS   | C <sub>0.5</sub> | AE             | WIS    | C <sub>0.5</sub> | AE             | WIS | C <sub>0.5</sub> | AE    | WIS | C <sub>0.95</sub> |
| epiforecasts-EpiExpert           | 615            | 427  | 2/8              | 955            | 784   | 1/7              | 2/7            | 981    | 655              | 2/8            | 5/8 | 1,850            | 1,379 | 2/7 | 3/7               |
| epiforecasts-EpiNow2             | 655            | 457  | 3/8              | 1,511          | 1,029 | 2/7              | 5/7            | 1,044  | 709              | 3/8            | 6/8 | 2,532            | 1,735 | 2/7 | 5/7               |
| FIAS_FZJ-EpiGer                  | 811            | 683  | 0/8              | 1,003          | 821   | 1/7              | 4/7            | 1,467  | 1,249            | 1/8            | 4/8 | 2,153            | 1,785 | 0/7 | 4/7               |
| Imperial-ensemble2               |                |      |                  |                |       |                  |                |        |                  |                |     |                  |       |     |                   |
| ITWW-county_repro                | 713            | 614  | 2/8              | 798            | 671   | 1/7              | 2/7            | 1,345  | 1,174            | 2/8            | 2/8 | 1,740            | 1,487 | 1/7 | 3/7               |
| LANL-GrowthRate                  |                | 2/5  | 4/5              |                | 2/4   | 3/4              | 3/4            | 1,364  | 1,098            | 2/8            | 4/8 | 2,238            | 2,006 | 2/7 | 3/7               |
| LeipzigMISE-SECIR                | 883            | 0/3  | 1/3              | 1,162          | 0/2   | 0/2              | 0/2            | 2,722  | 2,283            | 1/8            | 2/8 | 2,780            | 2,388 | 1/7 | 2/7               |
| MIT-CovidAnalytics-DELPHI        | 593*           | 475* | 1/7              | 1,039          | 893   | 1/7              | 2/7            | 1,211* | 1,054*           | 0/7            | 1/7 | 2,201            | 2,018 | 0/7 | 0/7               |
| SDSC-ISC-TrendModel              |                |      |                  |                |       |                  |                |        |                  |                |     |                  |       |     |                   |
| UCLA-SuEIR                       | 1,279          |      |                  | 1,659          |       |                  |                | 2,273  |                  |                |     | 3,615            |       |     |                   |
| USC-SikJalapa                    | 877            |      |                  | 1,110          |       |                  |                | 1,635  |                  |                |     | 2,344            |       |     |                   |
| KIT-baseline                     | 1,218          | 855  | 0/8              | 1,608          | 1,277 | 0/7              | 0/7            | 2,186  | 1,584            | 0/8            | 0/8 | 3,538            | 2,947 | 0/7 | 0/7               |
| KIT-extrapolation_baseline       | 752            | 481  | 3/8              | 1,526          | 992   | 1/7              | 6/7            | 1,252  | 799              | 3/8            | 7/8 | 2,666            | 1,731 | 1/7 | 6/7               |
| KIT-time-series_baseline         | 1,092          | 789  | 2/8              | 1,712          | 1,739 | 2/7              | 5/7            | 1,727  | 1,259            | 3/8            | 7/8 | 2,934            | 2,802 | 2/7 | 5/7               |
| KITCOVIDhub-inverse_wis_ensemble | 440            | 474  | 4/8              | 704            | 471   | 2/7              | 5/7            | 810    | 499              | 2/8            | 6/8 | 1,259            | 881   | 4/7 | 4/7               |
| KITCOVIDhub-mean_ensemble        | 488            | 297  | 3/8              | 676            | 433   | 2/7              | 6/7            | 880    | 557              | 3/8            | 6/8 | 1,301            | 837   | 3/7 | 5/7               |
| KITCOVIDhub-median_ensemble      | 493            | 334  | 3/8              | 599            | 445   | 4/7              | 5/7            | 897    | 590              | 3/8            | 6/8 | 1,310            | 978   | 3/7 | 5/7               |

Supplementary Table 6: Detailed summary of forecast evaluation for Poland, 3 and 4 weeks ahead (based on ECDC data)

| Model                            | Poland, cases  |         |                  |                |          |                  |                |         |                  |                |         |                  |                   |
|----------------------------------|----------------|---------|------------------|----------------|----------|------------------|----------------|---------|------------------|----------------|---------|------------------|-------------------|
|                                  | 3 wk ahead inc |         |                  | 4 wk ahead inc |          |                  | 3 wk ahead cum |         |                  | 4 wk ahead cum |         |                  |                   |
|                                  | AE             | WIS     | C <sub>0.5</sub> | AE             | WIS      | C <sub>0.5</sub> | AE             | WIS     | C <sub>0.5</sub> | AE             | WIS     | C <sub>0.5</sub> | C <sub>0.95</sub> |
| epiforecasts-EpiExpert           | 69,036         | 50,186  | 1/8              | 114,361        | 88,135   | 0/7              | 123,420        | 83,370  | 1/8              | 236,085        | 163,096 | 0/7              | 2/7               |
| epiforecasts-EpiNow2             | 100,091        | 69,829  | 2/8              | 257,145        | 183,720  | 2/7              | 146,121        | 96,446  | 3/8              | 422,386        | 291,126 | 2/7              | 4/7               |
| ICM-agentModel                   |                |         | 0/2              |                |          | 0/1              |                |         | 0/2              |                |         | 0/1              | 0/1               |
| ITWW-county_repro                | 69,096         | 59,629  | 1/8              | 148,272        | 132,809  | 0/7              | 115,872        | 95,988  | 1/8              | 271,133        | 233,566 | 0/7              | 1/7               |
| LANL-GrowthRate                  |                |         | 0/5              |                |          | 0/4              |                |         | 1/8              |                |         | 1/7              | 5/7               |
| MIMUW-StochSEIR                  |                |         | 1/3              |                |          | 0/2              |                |         | 1/3              |                |         | 0/2              | 0/2               |
| MIT-CovidAnalytics-DELPHI        | 113,802*       | 88,815* | 1/7              | 177,706*       | 149,967* | 2/6              | 116,589        | 94,704  | 0/8              | 263,653        | 226,693 | 0/7              | 2/7               |
| MOCOS-agent1                     | 70,362         | 60,944  | 1/8              | 140,691        | 125,932  | 2/7              |                |         |                  |                |         |                  |                   |
| SDSC-JSG-TrendModel              |                |         | 3/8              |                |          | 2/7              |                |         |                  |                |         |                  |                   |
| USC-SIkJalpha                    | 34,543         |         |                  | 32,410         |          |                  | 71,142         |         |                  | 110,078        |         |                  |                   |
| KIT-baseline                     | 75,183         | 54,568  | 1/8              | 89,395         | 63,975   | 1/7              | 159,350        | 118,193 | 1/8              | 238,036        | 183,364 | 1/7              | 3/7               |
| KIT-extrapolation_baseline       | 125,846        | 87,821  | 3/8              | 278,666        | 210,038  | 2/7              | 206,056        | 135,329 | 3/8              | 505,952        | 360,439 | 2/7              | 4/7               |
| KIT-time-series_baseline         | 123,714        | 90,048  | 5/8              | 228,443        | 129,974  | 5/7              | 217,544        | 145,712 | 5/8              | 476,907        | 376,333 | 5/7              | 7/7               |
| KITCOVIDhub-inverse.wis.ensemble | 78,949         | 57,514  | 1/8              | 160,008        | 129,539  | 2/7              | 115,211        | 82,871  | 2/8              | 266,961        | 197,054 | 1/7              | 5/7               |
| KITCOVIDhub-mean.ensemble        | 78,772         | 56,181  | 2/8              | 156,341        | 125,110  | 2/7              | 115,204        | 80,176  | 2/8              | 265,775        | 191,339 | 1/7              | 5/7               |
| KITCOVIDhub-median.ensemble      | 74,351         | 57,640  | 2/8              | 144,957        | 115,659  | 0/7              | 126,339        | 77,669  | 1/8              | 275,236        | 171,357 | 1/7              | 4/7               |

  

| Model                            | Poland, deaths |        |                  |                |        |                  |                |        |                  |                |        |                  |                   |
|----------------------------------|----------------|--------|------------------|----------------|--------|------------------|----------------|--------|------------------|----------------|--------|------------------|-------------------|
|                                  | 3 wk ahead inc |        |                  | 4 wk ahead inc |        |                  | 3 wk ahead cum |        |                  | 4 wk ahead cum |        |                  |                   |
|                                  | AE             | WIS    | C <sub>0.5</sub> | AE             | WIS    | C <sub>0.5</sub> | AE             | WIS    | C <sub>0.5</sub> | AE             | WIS    | C <sub>0.5</sub> | C <sub>0.95</sub> |
| epiforecasts-EpiExpert           | 901            | 592    | 1/8              | 1,329          | 906    | 1/7              | 1,828          | 1,135  | 1/8              | 3,171          | 2,035  | 1/7              | 4/7               |
| epiforecasts-EpiNow2             | 2,642          | 1,840  | 0/8              | 5,317          | 3,757  | 0/7              | 4,316          | 2,977  | 1/8              | 9,641          | 6,722  | 0/7              | 4/7               |
| ICM-agentModel                   | 1,854*         | 1,437* | 1/6              | 1,850*         | 1,505* | 1/5              | 4,376*         | 2,847* | 1/6              | 4,584*         | 3,275* | 1/5              | 3/5               |
| Imperial-ensemble2               |                |        |                  |                |        |                  |                |        |                  |                |        |                  |                   |
| ITWW-county_repro                | 1,113          | 958    | 1/8              | 2,016          | 1,799  | 1/7              | 2,375          | 2,080  | 0/8              | 4,592          | 4,103  | 0/7              | 1/7               |
| LANL-GrowthRate                  |                |        | 2/5              |                |        | 2/4              |                |        | 4/8              |                |        | 3/7              | 6/7               |
| MIMUW-StochSEIR                  |                |        | 0/3              |                |        | 0/2              |                |        | 0/3              |                |        | 0/2              | 0/2               |
| MIT-CovidAnalytics-DELPHI        | 1,122*         | 831*   | 1/7              | 1,851*         | 1,488* | 1/6              | 2,076*         | 1,728* | 1/7              | 3,899*         | 3,484* | 0/6              | 1/6               |
| MOCOS-agent1                     | 940            | 583    | 4/8              | 1,883          | 1,259  | 1/7              | 1,450          | 890    | 5/8              | 3,497          | 2,072  | 3/7              | 4/7               |
| SDSC-JSG-TrendModel              |                |        |                  |                |        |                  |                |        |                  |                |        |                  |                   |
| USC-SIkJalpha                    | 474            |        |                  | 801            |        |                  | 597            |        |                  | 1,445          |        |                  |                   |
| KIT-baseline                     | 1,208          | 862    | 2/8              | 1,544          | 1,201  | 1/7              | 2,368          | 1,768  | 1/8              | 3,986          | 3,226  | 1/7              | 2/7               |
| KIT-extrapolation_baseline       | 1,995          | 1,514  | 5/8              | 4,093          | 3,234  | 4/7              | 3,537          | 2,561  | 4/8              | 7,690          | 5,969  | 3/7              | 4/7               |
| KIT-time-series_baseline         | 2,235          | 1,487  | 4/8              | 3,084          | 2,176  | 3/7              | 3,799          | 2,505  | 5/8              | 5,787          | 3,872  | 4/7              | 7/7               |
| KITCOVIDhub-inverse.wis.ensemble | 1,039          | 649    | 2/8              | 2,205          | 1,447  | 0/7              | 1,668          | 1,069  | 4/8              | 3,850          | 2,467  | 2/7              | 5/7               |
| KITCOVIDhub-mean.ensemble        | 1,165          | 710    | 1/8              | 2,232          | 1,461  | 0/7              | 1,978          | 1,242  | 3/8              | 4,109          | 2,653  | 1/7              | 5/7               |
| KITCOVIDhub-median.ensemble      | 895            | 532    | 3/8              | 1,871          | 1,161  | 0/7              | 1,645          | 1,030  | 4/8              | 3,656          | 2,199  | 2/7              | 4/7               |
